# Supplementary material for: Clinical characteristics, surveillance, treatment allocation, and outcomes of non-alcoholic fatty liver disease-related hepatocellular carcinoma: a systematic review and meta-analysis
Source: PubMed Central journal article supplement (PMC9718369; doi:10.1016/s1470-2045(22)00078-x), 2022-03-04
Supplement: NIHMS1852064-supplement-Supplementary_Appendix.pdf [file NIHMS1852064-supplement-Supplementary_Appendix.pdf]

# THE LANCET Oncology

## Supplementary appendix

This appendix formed part of the original submission and has been peer reviewed. We post it as supplied by the authors.

Supplement to: Tan DJH, Ng CH, Lin SY, et al. Clinical characteristics, surveillance, treatment allocation, and outcomes of non-alcoholic fatty liver disease-related hepatocellular carcinoma: a systematic review and meta-analysis. *Lancet Oncol* 2022; published online March 4. [https://doi.org/10.1016/S1470-2045\(22\)00078-X](https://doi.org/10.1016/S1470-2045(22)00078-X).

### **Supplementary Material 1: Search strategy**

1: ('hcc' or 'hepatocellular carcinoma' or 'hepatic cell carcinoma' or 'liver neoplasm' or 'hepatoma' or 'liver cell carcinoma' or 'primary liver carcinoma'):ti,ab or 'liver cell carcinoma'/exp

2: 'nonalcoholic fatty liver'/exp or ('nafld' or 'nash' or 'fatty liver' or 'steatohep\*' or (('nonalcoholic' or 'non alcoholic' or non-alcoholic') and ('fatty liver' or 'steatohep\*'))):ti,ab

3: (outcome\* or 'natural history' or prognos\* or 'progression' or 'disease' or 'course' or 'evolution'):ti,ab

4: 'controlled study'/exp or 'randomized controlled trial'/exp or (('control\$' or 'randomized') near/2 ('study' or 'studies' or 'trial' or 'trials')):ti,ab or ('prospective' and ('study' or 'studies' or 'survey' or 'surveys' or 'analysis' or 'analyses' or 'trial\*')):ti,ab

5: 1 and 2 and 3 and 4

## Supplementary Material 2: Summary of included articles

| Author, year                             | Country/<br>region | Study<br>Duration | Non-NAFLD<br>etiologies | Total<br>population<br>(HCC) | Sample<br>Size<br>(NAFLD) | Sample<br>Size (Non-<br>NAFLD) | Sample<br>Size (HBV) | Sample<br>Size (HCV) | Sample<br>Size<br>(ALD) | Age<br>(mean<br>years,sd) | Gender<br>Male (%) | Quality<br>Assessment |
|------------------------------------------|--------------------|-------------------|-------------------------|------------------------------|---------------------------|--------------------------------|----------------------|----------------------|-------------------------|---------------------------|--------------------|-----------------------|
| Lim et al, 2021 <sup>1</sup> *           | Singapore          | 2008-2018         | HBV, HCV, ALD, AIH, PBC | 1186                         | 321                       | 865                            | 553                  | 124                  | 179                     | -                         | -                  | 7                     |
| Lin et al, 2021 <sup>2</sup>             | Taiwan             | 2011-2019         | HBV                     | 179                          | 23                        | 156                            | 156                  | -                    | -                       | 70.0 (14.2)               | 72.6               | 8                     |
| Pinyopornpanish et al, 2021 <sup>3</sup> | USA                | 2000-2015         | HBV, HCV, ALD, AIH, PBC | 2237                         | 587                       | 1650                           | 129                  | 873                  | 293                     | -                         | -                  | 8                     |
| Safcak et al, 2021 <sup>4</sup>          | Slovakia           | 2010-2016         | HBV, HCV, ALD           | 368                          | 54                        | 314                            | -                    | -                    | -                       | 69.8 (8.8)                | 66.6               | 7                     |
| Jung et al, 2021 <sup>5</sup>            | South Korea        | 2005-2015         | HBV                     | 232                          | 32                        | 200                            | 200                  | -                    | -                       | 61.0 (11.0)               | 73.7               | 8                     |
| Hiraoka et al, 2021 <sup>6</sup>         | Japan              | 2018-2021         | HBV, HCV, ALD           | 530                          | 103                       | 427                            | -                    | -                    | -                       | 74.7 (8.3)                | 78.8               | 8                     |
| Kumar et al, 2020 <sup>7</sup>           | Singapore          | 2000-2013         | ALD                     | 99                           | 54                        | 45                             | -                    | -                    | 45                      | 72.0 (9.0)                | 78.3               | 8                     |
| Paik et al, 2020 <sup>8</sup>            | USA                | 2007-2017         | HBV, HCV, ALD           | 11765                        | 4291                      | 7474                           | 727                  | 6099                 | 648                     | 70.3 (12.5)               | 78.3               | 7                     |
| Ahn et al, 2020 <sup>9</sup>             | South Korea        | 2000-2016         | HBV, ALD                | 622                          | 56                        | 566                            | 393                  | -                    | 173                     | 68.0 (10.9)               | 82.6               | 7                     |
| Hanumanthappa et al, 2020 <sup>10</sup>  | Canada             | 2011-2015         | HBV, HCV                | 195                          | 12                        | 183                            | 18                   | 37                   | -                       | -                         | -                  | 8                     |
| Wang et al, 2020 <sup>11</sup>           | USA                | 2010-2019         | HBV, HCV, ALD, AIH      | 6346                         | 1795                      | 4551                           | 355                  | 1563                 | 2399                    | -                         | -                  | 7                     |
| Liew et al, 2019 <sup>12</sup> *         | Singapore          | 1980-2015         | HBV                     | 1079                         | 163                       | 916                            | 916                  | -                    | -                       | 67.6 (10.8)               | 81.7               | 8                     |
| Tateishi et al, 2019 <sup>13</sup>       | Japan              | 2011-2015         | ALD, AIH, PBC           | 1106                         | 315                       | 791                            | -                    | -                    | 675                     | -                         | -                  | 7                     |
| Bengtsson et al, 2019 <sup>14</sup>      | Sweden             | 2004-2017         | HBV, HCV, ALD, AIH, PBC | 1562                         | 225                       | 1337                           | -                    | -                    | -                       | 71.3 (7.5)                | 77.1               | 8                     |
| Patkar et al, 2019 <sup>15</sup>         | India              | 2009-2017         | HBV, HCV, ALD           | 105                          | 40                        | 65                             | 42                   | 10                   | 13                      | -                         | -                  | 8                     |
| Hester et al, 2019 <sup>16</sup>         | USA                | 2008-2016         | HBV, HCV, ALD           | 1051                         | 92                        | 959                            | 87                   | 719                  | 153                     | 67.9 (10.8)               | 79.5               | 8                     |
| Pinero et al, 2018 <sup>17</sup>         | Latin America      | 2005-2012         | HBV, HCV, ALD, AIH      | 435                          | 25                        | 410                            | 110                  | 159                  | 73                      | 60.0 (4.0)                | 81.8               | 7                     |

|                                             |                |           |                    |      |      |      |     |      |      |             |      |   |
|---------------------------------------------|----------------|-----------|--------------------|------|------|------|-----|------|------|-------------|------|---|
| Pinero et al, 2018 <sup>18</sup>            | Argentina      | 2009-2016 | HBV, HCV, ALD, AIH | 708  | 81   | 627  | 38  | 262  | 147  | 63.0 (8.0)  | 75.8 | 7 |
| Ioannou et al, 2018 <sup>19</sup>           | USA            | 2001-2017 | HCV, ALD           | 9601 | 608  | 8993 | -   | 7605 | 1388 | 66.4 (8.1)  | 6.23 | 8 |
| Kim et al, 2018 <sup>20</sup>               | USA            | 1998-2015 | HBV, HCV, ALD      | 1884 | 95   | 1789 | 465 | 1194 | 130  | -           | -    | 8 |
| Sadler et al, 2018 <sup>21</sup>            | USA            | 2004-2014 | HBV, HCV, ALD      | 929  | 60   | 869  | 216 | 522  | 90   | 63.7 (5.4)  | 80.2 | 7 |
| Yoon et al, 2018 <sup>22</sup>              | South Korea    | 2005-2015 | HBV, HCV, ALD      | 1260 | 63   | 1197 | 869 | 137  | 191  | 68.0 (13.0) | 80.3 | 8 |
| Marot et al, 2017 <sup>23</sup>             | Belgium        | 1995-2014 | HCV, ALD           | 85   | 12   | 73   | -   | 35   | 38   | -           | -    | 8 |
| Kimura et al, 2017 <sup>24</sup>            | Japan          | 2996-2012 | ALD                | 61   | 30   | 31   | -   | -    | -    | 68.8 (6.1)  | 96.7 | 7 |
| Pais et al, 2016 <sup>25</sup>              | Italy          | 1995-2014 | HBV, HCV, ALD      | 323  | 39   | 284  | -   | -    | -    | 70.0 (9.0)  | 79.9 | 8 |
| Than et al, 2017 <sup>26</sup>              | United Kingdom | 2000-2014 | HCV                | 487  | 212  | 275  | -   | 275  | -    | 69.6 (8.7)  | 80.1 | 7 |
| Piscaglia et al, 2016 <sup>27</sup>         | Italy          | 2010-2012 | HCV                | 756  | 145  | 611  | -   | -    | -    | 67.8 (9.0)  | 64.7 | 8 |
| Meer et al, 2016 <sup>28</sup>              | Netherlands    | 2005-2012 | HBV, HCV, ALD      | 976  | 181  | 795  | 249 | 197  | 349  | -           | -    | 8 |
| Lopes et al, 2016 <sup>29</sup>             | Brazil         | 2000-2014 | HBV, HCV, ALD      | 66   | 8    | 58   | 11  | 34   | 13   | -           | -    | 7 |
| Mittal et al, 2015 <sup>30</sup> ^          | USA            | 2005-2010 | HCV, ALD           | 1419 | 120  | 1299 | -   | 1013 | 286  | 74.7, -     | 99.8 | 7 |
| Younossi et al, 2015 <sup>31</sup>          | USA            | 2004-2009 | HBV, HCV, ALD      | 4725 | 701  | 4024 | 471 | 2736 | 817  | 73.2 (8.1)  | 71.6 | 9 |
| Beste et al, 2015 <sup>32</sup> ^           | USA            | 1999-2014 | HBV, HCV, ALD, AIH | 7313 | 1029 | 6284 | 176 | 5225 | 873  | 70.5 (10.2) | 16.3 | 7 |
| Tateishi et al, 2015 <sup>33</sup>          | Japan          | 1991-2010 | ALD, AIH           | 2180 | 596  | 1584 | -   | -    | 1423 | 71.7 (8.2)  | 78.8 | 9 |
| Dyson et al, 2014 <sup>34</sup>             | United Kingdom | 2000-2010 | HBV, HCV, ALD, AIH | 416  | 136  | 280  | 29  | 65   | 178  | 71.0, -     | 84.1 | 8 |
| Paranaguá-Vezozzo et al, 2014 <sup>35</sup> | Brazil         | 1998-2008 | HBV, HCV, ALD      | 69   | 1    | 68   | 16  | 47   | 5    | -           | -    | 8 |
| Weinmann et al, 2014 <sup>36</sup>          | Germany        | 2004-2009 | HBV, HCV, AIH      | 283  | 28   | 255  | 79  | 174  | -    | -           | -    | 8 |

|                                                |           |           |                    |      |     |      |      |      |     |             |      |   |
|------------------------------------------------|-----------|-----------|--------------------|------|-----|------|------|------|-----|-------------|------|---|
| Teixeira et al, 2012 <sup>37</sup>             | Brazil    | 2001-2009 | HBV, HCV           | 9    | 5   | 4    | 2    | 2    | -   | -           | -    | 7 |
| Arase et al, 2012 <sup>38</sup>                | Japan     | 1994-2007 | HCV                | 277  | 10  | 267  | -    | 267  | -   | -           | -    | 9 |
| Hernandez-Alejandrio et al, 2012 <sup>39</sup> | Canada    | 2000-2011 | HCV                | 81   | 17  | 64   | -    | 64   | -   | 58.6 (4.2)  | 94.0 | 7 |
| Reddy et al, 2012 <sup>40</sup>                | USA       | 2000-2012 | HCV, ALD           | 214  | 54  | 162  | -    | -    | -   | 64.0 (9.9)  | 75.7 | 9 |
| Hucke et al, 2011 <sup>41</sup>                | Austria   | 1991-2009 | HBV, HCV, ALD      | 387  | 23  | 364  | 30   | 127  | 207 | -           | -    | 8 |
| Ascha et al, 2010 <sup>42</sup>                | USA       | 2003-2007 | HCV                | 89   | 25  | 64   | -    | 64   | -   | -           | -    | 9 |
| Tokushige et al, 2010 <sup>43</sup>            | Japan     | 1990-2007 | HCV                | 90   | 34  | 56   | -    | 56   | -   | 70.1 (7.6)  | 60.0 | 8 |
| Sanyal et al, 2006 <sup>44</sup>               | USA       | 1992-2004 | HCV                | 6    | 3   | 3    | -    | 3    | -   | -           | -    | 9 |
| Hashimoto et al, 2004 <sup>45</sup>            | Japan     | 1989-2003 | ALD                | 58   | 8   | 50   | -    | -    | 50  | 67.3 (19.7) | 78.5 | 8 |
| Shahid et al, 2009 <sup>46</sup>               | USA       | 1997-2008 | HBV, HCV, ALD, AIH | 447  | 27  | 430  | 52   | 138  | 99  | 63.1 (6.4)  | -    | 7 |
| Amarapurkar et al, 2013 <sup>47</sup>          | India     | 2010-2011 | HBV, HCV           | 46   | 6   | 40   | 26   | 14   | -   | -           | -    | 9 |
| Jain et al, 2012 <sup>48</sup>                 | India     | 2005-2010 | ALD                | 13   | 8   | 5    | -    | -    | 5   | 59.6 (3.0)  | 100  | 8 |
| Judith et al, 2010 <sup>49</sup>               | Germany   | 2007-2008 | HBV, HCV, ALD      | 119  | 36  | 83   | 29   | 35   | 19  | 68.6 (8.4)  | 84.0 | 7 |
| Schutte et al, 2014 <sup>50</sup>              | Germany   | 1994-2003 | Viral, ALD         | 440  | 43  | 397  | -    | -    | 299 | -           | -    | 8 |
| Koh et al, 2019 <sup>51</sup> *                | Singapore | 2000-2015 | Non-NAFLD          | 996  | 152 | 844  | -    | -    | -   | 68.0 (8.2)  | 77.7 | 9 |
| Yang et al, 2019 <sup>52</sup>                 | China     | 2003-2014 | HBV                | 1483 | 96  | 1387 | 1387 | -    | -   | 57.3 (12.5) | 88.5 | 8 |
| Wakai et al, 2011 <sup>53</sup>                | Japan     | 1990-2007 | HBV, HCV           | 225  | 17  | 208  | 61   | 147  | -   | -           | -    | 8 |
| Morisco et al, 2018 <sup>54</sup>              | Italy     | 1987-2014 | Viral, ALD         | 839  | 190 | 645  | -    | -    | 159 | -           | -    | 8 |
| Gawrieh et al, 2019 <sup>55</sup>              | USA       | 2000-2014 | HBV, HCV, ALD, AIH | 3076 | 767 | 2309 | 315  | 1263 | 655 | -           | -    | 7 |

|                                      |                                               |           |                                    |       |      |       |     |     |     |             |      |   |
|--------------------------------------|-----------------------------------------------|-----------|------------------------------------|-------|------|-------|-----|-----|-----|-------------|------|---|
| D'Silva et al, 2021 <sup>56</sup>    | South Korea                                   | 2004-2018 | HBV                                | 575   | 36   | 539   | 36  | -   | -   | -           | -    | 7 |
| Rimini et al, 2021 <sup>57</sup>     | Multicentre (Japan, Korea, Germany and Italy) | 2010-2021 | HCV, HBV                           | 1232  | 236  | 996   | 268 | 453 | -   | 72.0 (8.25) | 78.0 | 7 |
| Halder et al, 2019 <sup>58</sup>     | Europe                                        | 2002-2016 | Non-NAFLD                          | 20195 | 1073 | 19122 | -   | -   | -   | 61.0 (5.9)  | 83.7 | 7 |
| Kalaizakis et al, 2011 <sup>59</sup> | Europe                                        | 1994-2005 | HBV, HCV, ALD, AIH, Viral, PBC/PSC | 114   | 20   | 94    | 7   | 20  | 34  | -           | -    | 7 |
| Nilsson et al, 2019 <sup>60</sup>    | Europe                                        | 2011-2010 | HCV, ALD, AIH, PBC/PSC             | 202   | 32   | 170   | -   | 58  | 57  | -           | -    | 7 |
| Tohra et al, 2021 <sup>61</sup>      | India                                         | 2007-2015 | HBV, HCV, ALD, AIH, PBC/PSC        | 785   | 138  | 647   | 158 | 133 | 141 | 60 (7.97)   | 87.2 | 7 |

\* Lim et al. 2021, Liew et al. 2019, and Koh et al. 2019 included patients from the same institution (Singapore General Hospital). To avoid overlapping of cohorts, data from Liew et al. were only included in the analysis of the proportion of HCC patients that underwent surveillance before diagnosis, and data from Koh et al. were only included in the analysis of curative treatment allocation.

^ Mittal et al. 2015 and Beste et al. 2015 utilized data from the United States Veterans Administration database. To avoid overlapping of cohorts, data from Mittal et al. were only included in the analysis of the proportion of HCC patients that underwent surveillance before diagnosis.

**Abbreviations:** HBV, hepatitis B virus; HCV, hepatitis C virus; ALD, alcohol-associated liver disease; AIH, autoimmune hepatitis; NAFLD, non-alcoholic fatty liver disease; PBC/PSC, primary biliary cholangitis/primary sclerosing cholangitis; HCC, hepatocellular carcinoma

## REFERENCES

1. Lim MS, Goh GBB, Chang JPE, et al. A study of 3013 cases of hepatocellular carcinoma: Etiology and therapy before and during the current decade. *JGH Open* 2021; **5**(9): 1015-8.
2. Lin BZ, Lin TJ, Lin CL, et al. Differentiation of clinical patterns and survival outcomes of hepatocellular carcinoma on hepatitis B and nonalcoholic fatty liver disease. *Journal of the Chinese Medical Association* 2021; **84**(6): 606-13.
3. Pinyoponpanish K, Al-Yaman W, Dasarathy S, Romero-Marrero C, McCullough A. Hepatocellular Carcinoma in Patients Without Cirrhosis: The Fibrosis Stage Distribution, Characteristics and Survival. *Digestive Diseases & Sciences* 2021; **23**: 23.
4. Safcak D, Drazilova S, Gazda J, et al. Nonalcoholic Fatty Liver Disease-Related Hepatocellular Carcinoma: Clinical Patterns, Outcomes, and Prognostic Factors for Overall Survival-A Retrospective Analysis of a Slovak Cohort. *Journal of Clinical Medicine* 2021; **10**(14): 20.
5. Jung YB, Yoo JE, Han DH, et al. Clinical and survival outcomes after hepatectomy in patients with non-alcoholic fatty liver and hepatitis B-related hepatocellular carcinoma. *HPB* 2021; **23**(7): 1113-22.
6. Hiraoka A, Kumada T, Tada T, et al. Efficacy of lenvatinib for unresectable hepatocellular carcinoma based on background liver disease etiology: multi-center retrospective study. *Sci Rep* 2021; **11**(1): 16663.
7. Kumar R, Goh BBG, Kam JW, Chang P, Tan CK. Comparisons between non-alcoholic steatohepatitis and alcohol-related hepatocellular carcinoma. *Clinical and Molecular Hepatology* 2020; **26**(2): 196-208.
8. Paik JM, Golabi P, Biswas R, Alqahtani S, Venkatesan C, Younossi ZM. Nonalcoholic Fatty Liver Disease and Alcoholic Liver Disease are Major Drivers of Liver Mortality in the United States. *Hepatology Communications* 2020; **4**(6): 890-903.
9. Ahn SY, Kim SB, Song IH. Clinical Patterns and Outcome of Hepatocellular Carcinoma in Patients with Nonalcoholic Fatty Liver Disease. *Canadian Journal of Gastroenterology & Hepatology* 2020; **2020**: 4873875.
10. Hanumanthappa N, Cho BH, McKay A, et al. Epidemiology, clinical treatment patterns, and survival of hepatocellular carcinoma in Manitoba. *Canadian Liver Journal* 2020; **3**(2): 194-202.
11. Wang S, Toy M, Hang Pham TT, So S. Causes and trends in liver disease and hepatocellular carcinoma among men and women who received liver transplants in the U.S., 2010-2019. *PLoS One* 2020; **15**(9): e0239393.
12. Liew ZH, Goh GB, Hao Y, Chang PE, Tan CK. Comparison of Hepatocellular Carcinoma in Patients with Cryptogenic Versus Hepatitis B Etiology: A Study of 1079 Cases Over 3 Decades. *Digestive Diseases & Sciences* 2019; **64**(2): 585-90.
13. Tateishi R, Uchino K, Fujiwara N, et al. A nationwide survey on non-B, non-C hepatocellular carcinoma in Japan: 2011-2015 update. *Journal of Gastroenterology* 2019; **54**(4): 367-76.
14. Bengtsson B, Stal P, Wahlin S, Bjorkstrom NK, Hagstrom H. Characteristics and outcome of hepatocellular carcinoma in patients with NAFLD without cirrhosis. *Liver International* 2019; **39**(6): 1098-108.
15. Patkar S, Parray A, Mahendra B, Kurunkar S, Goel M. Performance of Hong Kong Liver Cancer staging system in patients of hepatocellular carcinoma treated with surgical resection: An Indian validation study. *Journal of Surgical Oncology* 2019; **120**(7): 1119-25.
16. Hester CA, Rich NE, Singal AG, Yopp AC. Comparative Analysis of Nonalcoholic Steatohepatitis- Versus Viral Hepatitis- and Alcohol-Related Liver Disease-Related Hepatocellular Carcinoma. *J Natl Compr Canc Netw* 2019; **17**(4): 322-9.
17. Pinero F, Costa P, Boteon YL, et al. A changing etiologic scenario in liver transplantation for hepatocellular carcinoma in a multicenter cohort study from Latin America. *Clinics & Research in Hepatology & Gastroenterology* 2018; **42**(5): 443-52.
18. Pinero F, Pages J, Marciano S, et al. Fatty liver disease, an emerging etiology of hepatocellular carcinoma in Argentina. *World Journal of Hepatology* 2018; **10**(1): 41-50.

19. Ioannou GN, Green P, Lowy E, Mun EJ, Berry K. Differences in hepatocellular carcinoma risk, predictors and trends over time according to etiology of cirrhosis. *PLoS One* 2018; **13**(9): e0204412.
20. Kim NG, Nguyen PP, Dang H, et al. Temporal trends in disease presentation and survival of patients with hepatocellular carcinoma: A real-world experience from 1998 to 2015. *Cancer* 2018; **124**(12): 2588-98.
21. Sadler EM, Mehta N, Bhat M, et al. Liver Transplantation for NASH-Related Hepatocellular Carcinoma Versus Non-NASH Etiologies of Hepatocellular Carcinoma. *Transplantation* 2018; **102**(4): 640-7.
22. Yoon CH, Jin YJ, Lee JW. Nonalcoholic fatty liver disease-associated hepatocellular carcinoma in a hepatitis B virus-endemic area. *Eur J Gastroenterol Hepatol* 2018; **30**(9): 1090-6.
23. Marot A, Henrion J, Knebel JF, Moreno C, Deltenre P. Alcoholic liver disease confers a worse prognosis than HCV infection and nonalcoholic fatty liver disease among patients with cirrhosis: An observational study. *PLoS ONE* 2017; **12**(10).
24. Kimura T, Kobayashi A, Tanaka N, et al. Clinicopathological characteristics of non-B non-C hepatocellular carcinoma without past hepatitis B virus infection. *Hepatology Research* 2017; **47**(5): 405-18.
25. Pais R, Fartoux L, Goumard C, et al. Temporal trends, clinical patterns and outcomes of NAFLD-related HCC in patients undergoing liver resection over a 20-year period. *Aliment Pharmacol Ther* 2017; **46**(9): 856-63.
26. Than NN, Ghazanfar A, Hodson J, et al. Comparing clinical presentations, treatments and outcomes of hepatocellular carcinoma due to hepatitis C and non-alcoholic fatty liver disease. *Qjm* 2017; **110**(2): 73-81.
27. Piscaglia F, Svegliati-Baroni G, Barchetti A, et al. Clinical patterns of hepatocellular carcinoma in nonalcoholic fatty liver disease: A multicenter prospective study. *Hepatology* 2016; **63**(3): 827-38.
28. van Meer S, van Erpecum KJ, Sprengers D, et al. Hepatocellular carcinoma in cirrhotic versus noncirrhotic livers: results from a large cohort in the Netherlands. *European Journal of Gastroenterology & Hepatology* 2016; **28**(3): 352-9.
29. Lopes Fde L, Coelho FF, Kruger JA, et al. INFLUENCE OF HEPATOCELLULAR CARCINOMA ETIOLOGY IN THE SURVIVAL AFTER RESECTION. *Arq Bras Cir Dig* 2016; **29**(2): 105-8.
30. Mittal S, Sada YH, El-Serag HB, et al. Temporal trends of nonalcoholic fatty liver disease-related hepatocellular carcinoma in the veteran affairs population. *Clinical Gastroenterology & Hepatology* 2015; **13**(3): 594-601.e1.
31. Younossi ZM, Otgonsuren M, Henry L, et al. Association of nonalcoholic fatty liver disease (NAFLD) with hepatocellular carcinoma (HCC) in the United States from 2004 to 2009. *Hepatology* 2015; **62**(6): 1723-30.
32. Beste LA, Leipertz SL, Green PK, Dominitz JA, Ross D, Ioannou GN. Trends in burden of cirrhosis and hepatocellular carcinoma by underlying liver disease in US veterans, 2001-2013. *Gastroenterology* 2015; **149**(6): 1471-82.e5; quiz e17-8.
33. Tateishi R, Okanou T, Fujiwara N, et al. Clinical characteristics, treatment, and prognosis of non-B, non-C hepatocellular carcinoma: a large retrospective multicenter cohort study. *J Gastroenterol* 2015; **50**(3): 350-60.
34. Dyson J, Jaques B, Chattopadhyay D, et al. Hepatocellular cancer: the impact of obesity, type 2 diabetes and a multidisciplinary team. *Journal of hepatology* 2014; **60**(1): 110-7.
35. Paranagua-Vezozzo DC, Ono SK, Alvarado-Mora MV, et al. Epidemiology of HCC in Brazil: incidence and risk factors in a ten-year cohort. *Annals of Hepatology* 2014; **13**(4): 386-93.
36. Weinmann A, Koch S, Niederle IM, et al. Trends in epidemiology, treatment, and survival of hepatocellular carcinoma patients between 1998 and 2009: an analysis of 1066 cases of a German HCC Registry. *J Clin Gastroenterol* 2014; **48**(3): 279-89.
37. Teixeira AC, Mente ED, Cantao CAB, et al. Clinical characteristics of 130 patients with hepatocellular carcinoma followed at a tertiary hospital from Brazil. *World Journal of Oncology* 2012; **3**(4): 165-72.



38. Arase Y, Kobayashi M, Suzuki F, et al. Difference in malignancies of chronic liver disease due to non-alcoholic fatty liver disease or hepatitis C in Japanese elderly patients. *Hepatology Research* 2012; **42**(3): 264-72.
39. Hernandez-Alejandro R, Croome KP, Drage M, et al. A comparison of survival and pathologic features of non-alcoholic steatohepatitis and hepatitis C virus patients with hepatocellular carcinoma. *World Journal of Gastroenterology* 2012; **18**(31): 4145-9.
40. Reddy SK, Steel JL, Chen HW, et al. Outcomes of curative treatment for hepatocellular cancer in nonalcoholic steatohepatitis versus hepatitis C and alcoholic liver disease. *Hepatology* 2012; **55**(6): 1809-19.
41. Hucke F, Sieghart W, Schöniger-Hekele M, Peck-Radosavljevic M, Müller C. Clinical characteristics of patients with hepatocellular carcinoma in Austria - is there a need for a structured screening program? *Wien Klin Wochenschr* 2011; **123**(17-18): 542-51.
42. Ascha MS, Hanouneh IA, Lopez R, Tamimi TA, Feldstein AF, Zein NN. The incidence and risk factors of hepatocellular carcinoma in patients with nonalcoholic steatohepatitis. *Hepatology* 2010; **51**(6): 1972-8.
43. Tokushige K, Hashimoto E, Yatsuji S, et al. Prospective study of hepatocellular carcinoma in nonalcoholic steatohepatitis in comparison with hepatocellular carcinoma caused by chronic hepatitis C. *J Gastroenterol* 2010; **45**(9): 960-7.
44. Sanyal AJ, Banas C Fau - Sargeant C, Sargeant C Fau - Luketic VA, et al. Similarities and differences in outcomes of cirrhosis due to nonalcoholic steatohepatitis and hepatitis C. (0270-9139 (Print)).
45. Hashimoto E, Taniai M, Kaneda H, et al. Comparison of hepatocellular carcinoma patients with alcoholic liver disease and nonalcoholic steatohepatitis. *Alcoholism: Clinical & Experimental Research* 2004; **28**(8 Suppl Proceedings): 164S-8S.
46. Malik SM, Gupte PA, de Vera ME, Ahmad J. Liver transplantation in patients with nonalcoholic steatohepatitis-related hepatocellular carcinoma. *Clin Gastroenterol Hepatol* 2009; **7**(7): 800-6.
47. Amarapurkar DN, Dharod M, Gautam S, Patel N. Risk of development of hepatocellular carcinoma in patients with NASH-related cirrhosis. *Tropical Gastroenterology* 2013; **34**(3): 159-63.
48. Jain D, Nayak NC, Saigal S. Hepatocellular carcinoma in nonalcoholic fatty liver cirrhosis and alcoholic cirrhosis: risk factor analysis in liver transplant recipients. *Eur J Gastroenterol Hepatol* 2012; **24**(7): 840-8.
49. Ertle J, Dechêne A, Sowa J-P, et al. Non-alcoholic fatty liver disease progresses to hepatocellular carcinoma in the absence of apparent cirrhosis. *International Journal of Cancer* 2011; **128**(10): 2436-43.
50. Schütte K, Schulz C, Poranzke J, et al. Characterization and prognosis of patients with hepatocellular carcinoma (HCC) in the non-cirrhotic liver. *BMC Gastroenterol* 2014; **14**: 117.
51. Koh YX, Tan HJ, Liew YX, et al. Liver Resection for Nonalcoholic Fatty Liver Disease-Associated Hepatocellular Carcinoma. *J Am Coll Surg* 2019; **229**(5): 467-78.e1.
52. Yang JD, Hainaut P, Gores GJ, Amadou A, Plymoth A, Roberts LR. A global view of hepatocellular carcinoma: trends, risk, prevention and management. *Nature reviews Gastroenterology & hepatology* 2019; **16**(10): 589-604.
53. Wakai T, Shirai Y, Sakata J, Korita PV, Ajioka Y, Hatakeyama K. Surgical outcomes for hepatocellular carcinoma in nonalcoholic fatty liver disease. *J Gastrointest Surg* 2011; **15**(8): 1450-8.
54. Morisco F, Guarino M, Valvano MR, et al. Metabolic disorders across hepatocellular carcinoma in Italy. *Liver Int* 2018; **38**(11): 2028-39.
55. Gawrieh S, Dakhoul L, Miller E, et al. Characteristics, aetiologies and trends of hepatocellular carcinoma in patients without cirrhosis: a United States multicentre study. *Aliment Pharmacol Ther* 2019; **50**(7): 809-21.
56. D'Silva M, Na HY, Cho JY, et al. Pathological prognostic factors for post-resection survival in patients with hepatocellular carcinoma associated with non-alcoholic fatty liver disease. *Translational Cancer Research* 2021; **10**(7): 3345-55.
57. Rimini M, Kudo M, Tada T, et al. Nonalcoholic steatohepatitis in hepatocarcinoma: new insights about its prognostic role in patients treated with lenvatinib. *ESMO Open* 2021; **6**(6): 100330.

58. Haldar D, Kern B, Hodson J, et al. Outcomes of liver transplantation for non-alcoholic steatohepatitis: A European Liver Transplant Registry study. *Journal of hepatology* 2019; **71**(2): 313-22.
59. Kalaitzakis E, Gunnarsdottir SA, Josefsson A, Björnsson E. Increased risk for malignant neoplasms among patients with cirrhosis. *Clin Gastroenterol Hepatol* 2011; **9**(2): 168-74.
60. Nilsson E, Anderson H, Sargenti K, Lindgren S, Prytz H. Clinical course and mortality by etiology of liver cirrhosis in Sweden: a population based, long-term follow-up study of 1317 patients. *Aliment Pharmacol Ther* 2019; **49**(11): 1421-30.
61. Tohra S, Duseja A, Taneja S, et al. Experience With Changing Etiology and Nontransplant Curative Treatment Modalities for Hepatocellular Carcinoma in a Real-Life Setting&#x2014;A Retrospective Descriptive Analysis. *Journal of Clinical and Experimental Hepatology* 2021; **11**(6): 682-90.

**Supplementary Material 3:** Proportion of NAFLD-related hepatocellular carcinoma across time periods and by study setting

|                         | No. of studies    | No. of patients | Pooled Proportion | Confidence Interval | Cochran-Q | I <sup>2</sup> | p value*         |
|-------------------------|-------------------|-----------------|-------------------|---------------------|-----------|----------------|------------------|
| <i>Overall analysis</i> |                   |                 |                   |                     |           |                | <b>0.045</b>     |
| Overall                 | 42                | 86311           | 15.07             | 11.88 - 18.93       | <0.01     | 99.40%         |                  |
| Before 2000             | 1                 | 440             | 9.77              | 7.33 - 12.92        | -         | -              |                  |
| 2000 - 2004             | 6                 | 4036            | 9.79              | 4.34 - 20.58        | <0.01     | 96.70%         |                  |
| 2005 - 2009             | 21                | 54822           | 15.60             | 10.89 - 21.85       | <0.01     | 99.10%         |                  |
| 2010 and beyond         | 14                | 27013           | 16.97             | 12.17 - 23.16       | <0.01     | 98.90%         |                  |
| <i>Western Pacific</i>  |                   |                 |                   |                     |           |                | <b>&lt;0.001</b> |
| Overall                 | 7                 | 7880            | 16.69             | 10.56 - 25.37       | <0.01     | 98.20%         |                  |
| Before 2000             | Insufficient data |                 |                   |                     |           |                |                  |
| 2000 - 2004             | 1                 | 2180            | 27.34             | 25.51 - 29.25       | -         | -              |                  |
| 2005 - 2009             | 2                 | 1618            | 11.93             | 8.19 - 17.05        | <0.01     | 92.40%         |                  |
| 2010 and beyond         | 4                 | 4082            | 17.26             | 8.59 - 31.68        | <0.01     | 98.60%         |                  |
| <i>Southeast Asia</i>   |                   |                 |                   |                     |           |                | -                |
| Overall                 | 3                 | 936             | 21.94             | 12.59 - 35.41       | <0.01     | 91.80%         |                  |
| Before 2000             | Insufficient data |                 |                   |                     |           |                |                  |
| 2000 - 2004             | Insufficient data |                 |                   |                     |           |                |                  |
| 2005 - 2009             | Insufficient data |                 |                   |                     |           |                |                  |
| 2010 and beyond         | 3                 | 936             | 21.94             | 12.59 - 35.41       | <0.01     | 91.80%         |                  |
| <i>Europe</i>           |                   |                 |                   |                     |           |                | 0.058            |
| Overall                 | 14                | 26039           | 15.52             | 11.50 - 20.62       | <0.01     | 98.60%         |                  |
| Before 2000             | 1                 | 440             | 9.77              | 7.33 - 12.92        | -         | -              |                  |
| 2000 - 2004             | 3                 | 1340            | 13.67             | 6.91 - 25.26        | <0.01     | 95.50%         |                  |
| 2005 - 2009             | 8                 | 22599           | 17.00             | 10.85 - 25.63       | <0.01     | 99.00%         |                  |
| 2010 and beyond         | 2                 | 1930            | 14.46             | 12.96 - 16.10       | 0.89      | 0.00%          |                  |
| <i>Americas</i>         |                   |                 |                   |                     |           |                | <b>&lt;0.001</b> |
| Overall                 | 18                | 51186           | 13.23             | 8.19 - 20.68        | <0.01     | 99.90%         |                  |
| Before 2000             | Insufficient data |                 |                   |                     |           |                |                  |
| 2000 - 2004             | 2                 | 516             | 3.49              | 2.21 - 5.47         | 0.34      | 0.00%          |                  |

|                                            |                   |       |       |               |       |        |                  |
|--------------------------------------------|-------------------|-------|-------|---------------|-------|--------|------------------|
| 2005 - 2009                                | 11                | 30605 | 15.27 | 8.40 - 26.14  | <0.01 | 99.10% |                  |
| 2010 and beyond                            | 5                 | 20065 | 15.42 | 8.04 - 27.56  | <0.01 | 99.20% |                  |
| <b>Subgroup analysis for the Americas</b>  |                   |       |       |               |       |        |                  |
| <i>North America</i>                       |                   |       |       |               |       |        | <b>&lt;0.001</b> |
| Overall                                    | 12                | 49388 | 17.22 | 10.46 - 27.01 | <0.01 | 99.70% |                  |
| Before 2000                                | Insufficient data |       |       |               |       |        |                  |
| 2000 - 2004                                | 1                 | 447   | 3.80  | 2.38 - 6.03   | -     | -      |                  |
| 2005 - 2009                                | 8                 | 29979 | 18.20 | 10.15 - 30.69 | <0.01 | 99.40% |                  |
| 2010 and beyond                            | 3                 | 19162 | 21.90 | 10.52 - 40.08 | <0.01 | 99.40% |                  |
| <i>South America</i>                       |                   |       |       |               |       |        | 0.156            |
| Overall                                    | 6                 | 1598  | 6.94  | 2.66 - 16.92  | 0.01  | 83.60% |                  |
| Before 2000                                | Insufficient data |       |       |               |       |        |                  |
| 2000 - 2004                                | 1                 | 69    | 1.45  | 0.20 - 9.58   | -     | -      |                  |
| 2005 - 2009                                | 3                 | 626   | 8.67  | 1.75 - 33.56  | <0.01 | 88.20% |                  |
| 2010 and beyond                            | 2                 | 903   | 9.21  | 5.94 - 14.02  | 0.03  | 77.70% |                  |
| <b>Subgroup analysis for study setting</b> |                   |       |       |               |       |        | <b>p value**</b> |
| Clinical cohort                            | 31                | 22569 | 14.82 | 11.08 - 19.55 | <0.01 | 97.60% | 0.793            |
| Administrative database                    | 11                | 63742 | 15.81 | 10.61 - 22.89 | <0.01 | 99.80% |                  |

\* = p value refers to the subgroup difference for changes in the proportion of NAFLD-related HCC across time periods, in each geographical region

\*\* = p value refers to subgroup difference for proportion of NAFLD-related HCC in clinical cohort studies versus administrative database studies

**Supplementary Material 4:** Comparison of patient characteristics in NAFLD-related HCC versus HCC from other etiologies; stratified by etiology

|                        | No. of Studies | No. of patients | Effect Size | 95% Confidence Interval | P-Value          | Cochran-Q | I <sup>2</sup> (%) |
|------------------------|----------------|-----------------|-------------|-------------------------|------------------|-----------|--------------------|
| <b>Hepatitis B</b>     |                |                 |             |                         |                  |           |                    |
| Age                    | 11             | 11993           | MD: 8.00    | 6.12 to 9.88            | <b>&lt;0.001</b> | <0.01     | 87.7               |
| Body Mass Index        | 7              | 3227            | MD: 2.62    | 0.56 to 4.68            | <b>0.013</b>     | <0.01     | 95.9               |
| Male Gender            | 13             | 12236           | OR: 0.53    | 0.37 to 0.75            | <b>0.002</b>     | <0.01     | 69.6               |
| Diabetes               | 9              | 9742            | OR: 2.68    | 1.17 to 6.16            | <b>0.026</b>     | <0.01     | 93.6               |
| Hypertension           | 6              | 8293            | OR: 3.46    | 1.32 to 9.11            | <b>0.021</b>     | <0.01     | 89.4               |
| Hyperlipidaemia        | 1              | 179             | OR: 2.58    | 1.41 to 4.73            | <b>0.002</b>     | -         | -                  |
| Cardiovascular Disease | 2              | 6190            | OR: 1.81    | 0.02 to 132.47          | 0.330            | <0.01     | 92.7               |
| Cirrhosis              | 8              | 2830            | OR: 0.30    | 0.16 to 0.60            | <b>0.004</b>     | <0.01     | 69.2               |
| <b>Hepatitis C</b>     |                |                 |             |                         |                  |           |                    |
| Age                    | 11             | 31923           | MD: 5.58    | 3.70 to 7.45            | <b>&lt;0.001</b> | <0.01     | 97.1               |
| Body Mass Index        | 8              | 16272           | MD: 3.64    | 2.05 to 5.23            | <b>&lt;0.001</b> | <0.01     | 98.4               |
| Male Gender            | 14             | 32288           | OR: 0.79    | 0.53 to 1.17            | 0.212            | <0.01     | 83.2               |
| Diabetes               | 10             | 28405           | OR: 6.28    | 3.25 to 12.13           | <b>&lt;0.001</b> | <0.01     | 97.4               |
| Hypertension           | 6              | 13380           | OR: 2.97    | 1.07 to 8.22            | <b>0.040</b>     | <0.01     | 94.7               |
| Hyperlipidaemia        | 2              | 901             | OR: 4.07    | 0.00 to 127000          | 0.335            | 0.05      | 74.7               |
| Cardiovascular Disease | 4              | 15716           | OR: 2.36    | 0.83 to 6.71            | 0.080            | <0.01     | 95.9               |
| Cirrhosis              | 7              | 3623            | OR: 0.16    | 0.06 to 0.44            | <b>0.004</b>     | <0.01     | 88.2               |
| <b>Alcohol</b>         |                |                 |             |                         |                  |           |                    |
| Age                    | 13             | 13794           | MD: 4.74    | 3.80 to 5.89            | <b>&lt;0.001</b> | <0.01     | 78.8               |
| Body Mass Index        | 9              | 4968            | MD: 2.54    | 1.88 to 3.19            | <b>&lt;0.001</b> | <0.01     | 80.9               |
| Male Gender            | 14             | 14108           | OR: 0.17    | 0.11 to 0.28            | <b>&lt;0.001</b> | <0.01     | 84.1               |
| Diabetes               | 12             | 12276           | OR: 2.75    | 1.55 to 4.87            | <b>&lt;0.001</b> | <0.01     | 94.0               |
| Hypertension           | 9              | 8310            | OR: 2.27    | 1.31 to 3.93            | <b>&lt;0.001</b> | <0.01     | 86.7               |
| Hyperlipidaemia        | 4              | 463             | OR: 2.70    | 1.19 to 6.10            | <b>0.031</b>     | 0.26      | 24.5               |
| Cardiovascular Disease | 3              | 6863            | OR: 2.40    | 0.33 to 17.7            | 0.201            | <0.01     | 97.2               |
| Cirrhosis              | 9              | 3486            | OR: 0.32    | 0.17 to 0.60            | <b>0.003</b>     | 0.01      | 58.9               |

**Supplementary Material 4B:** Comparison of patient and tumor characteristics in NAFLD-related HCC versus HBV-related HCC; by geographical region

| <b>Versus hepatitis B</b> | <b>No. of Studies</b> | <b>No. of patients</b> | <b>Effect Size</b> | <b>95% Confidence Interval</b> | <b>P-Value</b> | <b>Cochran-Q</b> | <b>I<sup>2</sup> (%)</b> | <b>Subgroup difference*</b> |
|---------------------------|-----------------------|------------------------|--------------------|--------------------------------|----------------|------------------|--------------------------|-----------------------------|
| <i>Age</i>                |                       |                        |                    |                                |                |                  |                          |                             |
| Western Pacific           | 6                     | 4354                   | 8.82               | 7.17 to 10.47                  | <0.001         | 0.13             | 41.7                     | 0.526                       |
| Europe                    | 1                     | 65                     | 8.80               | 3.76 to 13.84                  | <0.001         | -                | -                        |                             |
| Americas                  | 4                     | 7574                   | 6.95               | 4.12 to 9.78                   | <0.001         | <0.01            | 93.5                     |                             |
| <i>Body Mass Index</i>    |                       |                        |                    |                                |                |                  |                          |                             |
| Western Pacific           | 4                     | 1792                   | 1.57               | 0.55 to 2.59                   | 0.003          | 0.2              | 35.5                     | 0.166                       |
| Europe                    | 2                     | 230                    | 4.20               | 0.59 to 7.82                   | 0.023          | <0.01            | 91.1                     |                             |
| Americas                  | 1                     | 1205                   | 2.70               | 1.70 to 3.70                   | <0.001         | -                | -                        |                             |
| <i>Male Gender</i>        |                       |                        |                    |                                |                |                  |                          |                             |
| Western Pacific           | 7                     | 4432                   | 0.51               | 0.35 - 0.76                    | 0.006          | 0.15             | 35.2                     | 0.791                       |
| Europe                    | 2                     | 230                    | 0.71               | 0.29 - 1.71                    | 0.798          | 0.14             | 53.2                     |                             |
| Americas                  | 4                     | 7574                   | 0.46               | 0.13 - 1.62                    | 0.143          | <0.01            | 87.1                     |                             |
| <i>Diabetes</i>           |                       |                        |                    |                                |                |                  |                          |                             |
| Western Pacific           | 5                     | 3275                   | 3.27               | 1.75 - 6.10                    | <0.001         | 0.09             | 50.1                     | 0.846                       |
| Europe                    | 1                     | 65                     | 3.36               | 1.21 - 9.36                    | 0.006          | -                | -                        |                             |
| Americas                  | 3                     | 6402                   | 1.37               | 1.10 - 1.72                    | 0.020          | <0.01            | 97.8                     |                             |
| <i>Hypertension</i>       |                       |                        |                    |                                |                |                  |                          |                             |
| Western Pacific           | 4                     | 3096                   | 3.19               | 1.47 - 6.94                    | <0.001         | 0.07             | 57.3                     | 0.808                       |
| Europe                    | Insufficient data     |                        |                    |                                |                |                  |                          |                             |
| Americas                  | 2                     | 5197                   | 1.79               | 1.34 - 2.40                    | <0.001         | <0.01            | 96.8                     |                             |
| <i>Cirrhosis</i>          |                       |                        |                    |                                |                |                  |                          |                             |
| Western Pacific           | 5                     | 2421                   | 0.23               | 0.12 - 0.45                    | 0.003          | 0.15             | 41.2                     | <b>0.017</b>                |
| Europe                    | 2                     | 230                    | 0.33               | 0.14 - 0.75                    | 0.009          | 0.03             | 80                       |                             |
| Americas                  | 1                     | 179                    | 0.90               | 0.40 - 2.02                    | 0.324          | -                | -                        |                             |
| <i>Tumor diameter</i>     |                       |                        |                    |                                |                |                  |                          |                             |
| Western Pacific           | 5                     | 3275                   | 1.14               | 0.68 to 1.61                   | <0.001         | 0.41             | 0.2                      | <b>&lt;0.001</b>            |
| Europe                    | 1                     | 165                    | -1.00              | -1.44 to -0.56                 | <0.001         | -                | -                        |                             |
| Americas                  | 1                     | 179                    | -0.60              | -2.10 to 0.90                  | 0.432          | -                | -                        |                             |

\*=Subgroup difference refers to comparison of effect size between geographical region

**Supplementary Material 4C:** Comparison of patient and tumor characteristics in NAFLD-related HCC versus HCV-related HCC; by geographical region

| <b>Versus hepatitis C</b> | <b>No. of Studies</b> | <b>No. of patients</b> | <b>Effect Size</b> | <b>95% Confidence Interval</b> | <b>P-Value</b> | <b>Cochran-Q</b> | <b>I<sup>2</sup> (%)</b> | <b>Subgroup difference*</b> |
|---------------------------|-----------------------|------------------------|--------------------|--------------------------------|----------------|------------------|--------------------------|-----------------------------|
| <i>Age</i>                |                       |                        |                    |                                |                |                  |                          |                             |
| Western Pacific           | 2                     | 290                    | -0.40              | -2.89 to 2.09                  | 0.754          | 0.32             | 0.0                      | <b>&lt;0.001</b>            |
| Europe                    | 3                     | 1314                   | 4.09               | -6.34 to 14.52                 | 0.442          | <0.01            | 98.6                     |                             |
| Americas                  | 6                     | 29186                  | 7.77               | 6.13 to 9.41                   | <0.001         | <0.01            | 96.1                     |                             |
| <i>Body Mass Index</i>    |                       |                        |                    |                                |                |                  |                          |                             |
| Western Pacific           | 2                     | 290                    | 1.01               | -0.44 to 2.45                  | 0.171          | 0.14             | 54.4                     | <b>0.002</b>                |
| Europe                    | 4                     | 1515                   | 4.50               | 1.81 to 7.19                   | 0.001          | <0.01            | 97.9                     |                             |
| Americas                  | 2                     | 14467                  | 4.29               | 2.92 to 5.66                   | <0.001         | <0.01            | 95.0                     |                             |
| <i>Male Gender</i>        |                       |                        |                    |                                |                |                  |                          |                             |
| Western Pacific           | 3                     | 454                    | 0.98               | 0.39 - 2.46                    | 0.944          | 0.43             | 0.0                      | <b>0.004</b>                |
| Europe                    | 4                     | 1515                   | 1.50               | 0.68 - 3.29                    | 0.200          | 0.03             | 66.1                     |                             |
| Americas                  | 7                     | 30319                  | 0.52               | 0.32 - 0.86                    | 0.020          | <0.01            | 81.7                     |                             |
| <i>Diabetes</i>           |                       |                        |                    |                                |                |                  |                          |                             |
| Western Pacific           | 2                     | 290                    | 1.86               | 1.14 - 3.02                    | 0.014          | <0.01            | 93.3                     | 0.663                       |
| Europe                    | 3                     | 1314                   | 8.03               | 4.74 - 13.59                   | 0.003          | 0.48             | 0.0                      |                             |
| Americas                  | 5                     | 26801                  | 7.99               | 2.62 - 24.41                   | 0.007          | <0.01            | 98.7                     |                             |
| <i>Hypertension</i>       |                       |                        |                    |                                |                |                  |                          |                             |
| Western Pacific           | 2                     | 290                    | 1.37               | 0.84 - 2.26                    | 0.203          | 0.68             | 0.0                      | <b>&lt;0.001</b>            |
| Europe                    | 1                     | 756                    | 5.42               | 3.62 - 8.13                    | <0.001         | -                | -                        |                             |
| Americas                  | 3                     | 12334                  | 1.33               | 1.16 - 1.52                    | <0.001         | <0.01            | 95.7                     |                             |
| <i>Cirrhosis</i>          |                       |                        |                    |                                |                |                  |                          |                             |
| Western Pacific           | 1                     | 164                    | 0.84               | 0.31 - 2.31                    | 0.741          | -                | -                        | <b>&lt;0.001</b>            |
| Europe                    | 4                     | 1515                   | 0.06               | 0.02 - 0.16                    | <0.001         | 0.16             | 41.6                     |                             |
| Americas                  | 2                     | 1944                   | 0.27               | 0.19 - 0.38                    | <0.001         | 0.24             | 26.5                     |                             |
| <i>Tumor diameter</i>     |                       |                        |                    |                                |                |                  |                          |                             |
| Western Pacific           | 2                     | 290                    | 1.40               | -1.89 to 4.68                  | 0.405          | <0.01            | 95.1                     | 0.118                       |
| Europe                    | 2                     | 957                    | 1.11               | 0.63 to 1.58                   | <0.001         | 0.05             | 74.6                     |                             |
| Americas                  | 2                     | 892                    | -0.13              | -1.22 to 0.95                  | 0.811          | 0.17             | 47.3                     |                             |

\*=Subgroup difference refers to comparison of effect size between geographical region

**Supplementary Material 4D:** Comparison of patient and tumor characteristics in NAFLD-related HCC versus alcohol-associated HCC; by geographical region

| Versus alcohol         | No. of Studies    | No. of patients | Effect Size | 95% Confidence Interval | P-Value | Cochran-Q | I <sup>2</sup> (%) | Subgroup difference* |
|------------------------|-------------------|-----------------|-------------|-------------------------|---------|-----------|--------------------|----------------------|
| <i>Age</i>             |                   |                 |             |                         |         |           |                    |                      |
| Western Pacific        | 6                 |                 | 4.17        | 2.22 to 6.11            | <0.001  | 0.03      | 59.0               | <b>0.008</b>         |
| Europe                 | 1                 | 55              | 2.70        | -1.05 to 6.48           | 0.159   | -         | -                  |                      |
| Americas               | 5                 | 10600           | 4.60        | 3.50 to 5.7             | <0.001  | <0.01     | 85.1               |                      |
| <i>Body Mass Index</i> |                   |                 |             |                         |         |           |                    |                      |
| Western Pacific        | 5                 |                 | 2.25        | 0.80 to 3.71            | 0.028   | 0.03      | 65.5               | 0.675                |
| Europe                 | 2                 | 369             | 2.77        | 1.11 to 4.43            | 0.001   | 0.19      | 40.9               |                      |
| Americas               | 2                 | 3898            | 2.65        | 1.37 to 3.92            | <0.001  | <0.01     | 91.3               |                      |
| <i>Male Gender</i>     |                   |                 |             |                         |         |           |                    |                      |
| Western Pacific        | 6                 | 2720            | 0.10        | 0.08 - 0.12             | <0.001  | 0.82      | 0                  | <b>0.001</b>         |
| Europe                 | 2                 | 369             | 0.33        | 0.17 - 0.62             | <0.001  | 0.22      | 34.9               |                      |
| Americas               | 6                 | 11006           | 0.24        | 0.12 - 0.50             | 0.004   | <0.01     | 78.8               |                      |
| <i>Diabetes</i>        |                   |                 |             |                         |         |           |                    |                      |
| Western Pacific        | 6                 | 2720            | 2.49        | 1.01 - 6.13             | 0.048   | 0.01      | 75.0               | 0.460                |
| Europe                 | 1                 | 55              | 1.29        | 0.41 - 4.01             | 0.664   | -         | -                  |                      |
| Americas               | 5                 | 9488            | 3.19        | 0.90 - 11.23            | 0.063   | <0.01     | 97.4               |                      |
| <i>Hypertension</i>    |                   |                 |             |                         |         |           |                    |                      |
| Western Pacific        | 6                 | 2720            | 2.12        | 1.76 - 2.55             | <0.001  | 0.70      | 0                  | 0.698                |
| Europe                 | Insufficient data |                 |             |                         |         |           |                    |                      |
| Americas               | 3                 | 5590            | 2.80        | 0.13 - 59.94            | 0.285   | <0.01     | 94.7               |                      |
| <i>Cirrhosis</i>       |                   |                 |             |                         |         |           |                    |                      |
| Western Pacific        | 5                 | 2466            | 0.35        | 0.18 - 0.70             | 0.013   | 0.17      | 38.0               | <b>0.020</b>         |
| Europe                 | 2                 | 369             | 0.02        | 0.01 - 0.11             | <0.001  | 0.26      | 21.9               |                      |
| Americas               | 2                 | 651             | 0.47        | 0.32 - 0.70             | <0.001  | 0.22      | 34.7               |                      |
| <i>Tumor diameter</i>  |                   |                 |             |                         |         |           |                    |                      |
| Western Pacific        | 5                 | 2621            | 1.03        | -0.38 to 2.43           | 0.152   | <0.01     | 87.5               | 0.413                |
| Europe                 | 1                 | 314             | 0.1         | 0.03 to 0.17            | 0.003   | -         | -                  |                      |
| Americas               | 1                 | 245             | 0.3         | -0.91 to 1.51           | 0.627   | -         | -                  |                      |

\*=Subgroup difference refers to comparison of effect size between geographical region



**Supplementary Material 5:** Comparison of tumor characteristics in NAFLD-related HCC versus HCC from other etiologies; stratified by etiology

|                    | No. of Studies | No. of patients | Effect Size | 95% Confidence Interval | P-Value      | Cochran-Q | I <sup>2</sup> (%) |
|--------------------|----------------|-----------------|-------------|-------------------------|--------------|-----------|--------------------|
| <b>Hepatitis B</b> |                |                 |             |                         |              |           |                    |
| Tumour Diameter    | 7              | 3619            | MD: 0.52    | -0.48 to 1.52           | 0.310        | <0.01     | 87.5               |
| Alpha-fetoprotein  | 6              | 2883            | MD -0.19    | -0.42 to 0.04           | 0.109        | <0.01     | 72.7               |
| Uni-nodular HCC    | 6              | 4379            | OR 1.23     | 0.97 - 1.56             | 0.079        | 0.66      | 0.00%              |
| BCLC 0/A           | 4              | 2639            | OR 1.02     | 0.55 - 1.90             | 0.913        | 0.16      | 42.10%             |
| BCLC B             | 5              | 2818            | OR 1.12     | 0.74 - 1.72             | 0.488        | 0.43      | 0.00%              |
| BCLC C/D           | 5              | 2818            | OR 0.80     | 0.39 - 1.63             | 0.433        | 0.04      | 59.90%             |
| <b>Hepatitis C</b> |                |                 |             |                         |              |           |                    |
| Tumour Diameter    | 6              | 2139            | MD: 0.78    | 0.07 to 1.48            | 0.031        | <0.01     | 87.3               |
| Alpha-fetoprotein  | 8              | 10709           | MD 0.02     | -0.09 to 0.13           | 0.744        | 0.06      | 49.0               |
| Uni-nodular HCC    | 3              | 454             | OR 0.81     | 0.11 - 5.86             | 0.697        | 0.05      | 66.20%             |
| BCLC 0/A           | 2              | 956             | OR 0.69     | 0.31 - 1.51             | 0.104        | 0.7       | 0.00%              |
| BCLC B             | 3              | 1767            | OR 1.25     | 0.67 - 2.33             | 0.257        | 0.48      | 0.00%              |
| BCLC C/D           | 3              | 1767            | OR 1.10     | 0.33 - 3.68             | 0.766        | 0.02      | 73.70%             |
| <b>Alcohol</b>     |                |                 |             |                         |              |           |                    |
| Tumour Diameter    | 7              | 3180            | MD: 0.56    | 0.12 to 1.00            | <b>0.012</b> | <0.01     | 81.4               |
| Alpha-fetoprotein  | 7              | 2939            | MD: 0.19    | -0.04 to 0.41           | <b>0.100</b> | <0.01     | 75.5               |
| Uni-nodular HCC    | 4              | 2430            | OR 1.12     | 0.60 - 2.08             | 0.612        | 0.07      | 57.70%             |
| BCLC 0/A           | 3              | 582             | OR 0.79     | 0.16 - 3.89             | 0.591        | 0.07      | 61.50%             |
| BCLC B             | 4              | 827             | OR 1.37     | 1.07 - 1.76             | 0.028        | 0.94      | 0.00%              |
| BCLC C/D           | 4              | 827             | OR 1.11     | 0.36 - 3.43             | 0.783        | <0.01     | 75.60%             |

Abbreviations: BCLC = Barcelona Clinic Liver Cancer ; ECOG = Eastern Cooperative Oncology Group; BCLC: Barcelona Clinic Liver Cancer

**Supplementary Material 6:** Factors associated with receiving curative therapy\* among patients with NAFLD-related HCC

| <b>Factors</b>    | <b>No. of studies</b> | <b>No. of patients</b> | <b>Odds Ratio</b> | <b>95% Confidence Interval</b> | <b>P-Value</b>   |
|-------------------|-----------------------|------------------------|-------------------|--------------------------------|------------------|
| Age               | 18                    | 30082                  | 0.54              | 0.39 to 0.74                   | <b>&lt;0.001</b> |
| Male              | 18                    | 30082                  | 1.04              | 0.95 to 1.13                   | 0.438            |
| Body Mass Index   | 13                    | 25236                  | 1.19              | 0.59 to 2.39                   | 0.633            |
| Diabetes          | 14                    | 7463                   | 0.96              | 0.89 to 1.03                   | 0.270            |
| Hypertension      | 11                    | 6429                   | 0.96              | 0.89 to 1.07                   | 0.390            |
| Hyperlipidaemia   | 6                     | 3186                   | 0.97              | 0.90 to 1.04                   | 0.421            |
| Cirrhosis         | 16                    | 8808                   | 0.93              | 0.89 to 0.98                   | <b>0.004</b>     |
| BCLC 0/A          | 7                     | 5716                   | 1.04              | 1.02 to 1.06                   | <b>&lt;0.001</b> |
| BCLC C/D          | 7                     | 5716                   | 0.96              | 0.94 to 0.98                   | <b>&lt;0.001</b> |
| Tumour diameter   | 11                    | 4873                   | 0.92              | 0.41 to 2.06                   | 0.839            |
| Alpha-fetoprotein | 12                    | 7129                   | 1.00              | 1.00 to 1.00                   | 0.639            |

Legend: \*defined as liver transplantation, liver resection or ablation

Abbreviations: BCLC = Barcelona Clinic Liver Cancer ; ECOG = Eastern Cooperative Oncology Group

**Supplementary Material 7:** Summary of risk factors affecting overall survival (OS) and disease-free survival (DFS) of NAFLD-related HCC

|                              | No. of Studies | Beta-Coefficient | 95% Confidence Interval | P-Value      |
|------------------------------|----------------|------------------|-------------------------|--------------|
| <b>Overall survival</b>      |                |                  |                         |              |
| Age                          | 21             | -0.01            | -0.03 to 0.01           | 0.540        |
| Male Gender                  | 22             | -0.24            | -1.20 to 0.72           | 0.623        |
| Body Mass Index              | 14             | 0.01             | -0.03 to 0.05           | 0.605        |
| Diabetes                     | 16             | 0.01             | -1.10 to 1.11           | 0.990        |
| Hypertension                 | 12             | 0.05             | -0.64 to 0.74           | 0.886        |
| Hyperlipidaemia              | 5              | 0.74             | -1.20 to 2.69           | 0.454        |
| Cardiovascular Disease       | 4              | 0.41             | -2.07 to 2.88           | 0.746        |
| Early BCLC stage             | 10             | 0.26             | -0.54 to 1.07           | 0.517        |
| Late BCLC stage              | 10             | 0.09             | -0.92 to 1.10           | 0.863        |
| Tumour Diameter              | 12             | 0.01             | -0.10 to 0.13           | 0.836        |
| Alpha-fetoprotein            | 12             | 0.00             | 0.00 to 0.00            | 0.918        |
| <b>Disease free survival</b> |                |                  |                         |              |
| Age                          | 8              | 0.01             | -0.03 to 0.05           | 0.653        |
| Male Gender                  | 9              | -0.89            | -3.73 to 1.95           | 0.540        |
| Body Mass Index              | 4              | -0.08            | -0.19 to 0.03           | 0.164        |
| Diabetes                     | 5              | -0.39            | -2.05 to 1.28           | 0.651        |
| Hypertension                 | 5              | -0.44            | -1.59 to 0.70           | 0.448        |
| Tumour Diameter              | 7              | 0.03             | -0.15 to 0.21           | 0.719        |
| Alpha-fetoprotein            | 4              | -0.02            | -0.03 to 0.00           | <b>0.029</b> |

Legend: \*denote statistical significance at  $p < 0.05$ ; BCLC: Barcelona Clinic Liver Cancer

**Supplementary Material 8:** Overall and disease-free survival in NAFLD-related HCC vs HCC from other etiologies; stratified by individual etiology

|                              | No. of Studies | No. of Patients | Hazard Ratio | 95% Confidence Interval | P-Value | Cochran-Q | I <sup>2</sup> (%) | Subgroup difference** |
|------------------------------|----------------|-----------------|--------------|-------------------------|---------|-----------|--------------------|-----------------------|
| <b>Overall survival</b>      |                |                 |              |                         |         |           |                    |                       |
| Hepatitis C virus            | 9              | 3997            | 1.24         | 0.86 to 1.81            | 0.253   | <0.01     | 99.8               | 0.388                 |
| Western Pacific              | 1              | 90              | 0.90         | 0.49 to 1.66            | 0.746   | -         | -                  |                       |
| Europe                       | 5              | 1921            | 1.42         | 0.88 to 2.31            | 0.150   | <0.01     | 99.7               |                       |
| Americas                     | 3              | 1986            | 0.94         | 0.78 to 1.14            | 0.938   | 0.14      | 49.9               |                       |
| Hepatitis B virus            | 10             | 4790            | 1.10         | 0.88 to 1.38            | 0.384   | <0.01     | 97.7               | 0.573                 |
| Western Pacific              | 5              | 2918            | 0.92         | 0.70 to 1.21            | 0.531   | 0.61      | 0.0                |                       |
| Europe                       | 2              | 595             | 1.26         | 0.86 to 1.84            | 0.238   | <0.01     | 99.7               |                       |
| Americas                     | 2              | 198             | 1.45         | 0.35 to 6.05            | 0.614   | <0.01     | 94.1               |                       |
| South-East Asia              | 1              | 1079            | 1.05         | 0.87 to 1.28            | 0.596   | -         | -                  |                       |
| Alcohol                      | 8              | 1933            | 1.19         | 0.94 to 1.52            | 0.148   | <0.01     | 88.1               | 0.299                 |
| Western Pacific              | 1              | 229             | 0.93         | 0.67 to 1.28            | 0.653   | -         | -                  |                       |
| Europe                       | 3              | 933             | 1.10         | 0.80 to 1.53            | 0.559   | <0.01     | 91.5               |                       |
| Americas                     | 3              | 672             | 1.71         | 0.82 to 3.55            | 0.150   | <0.01     | 92.0               |                       |
| South-East Asia              | 1              | 99              | 0.78         | 0.49 to 1.25            | 0.303   | -         | -                  |                       |
| <b>Disease-free survival</b> |                |                 |              |                         |         |           |                    |                       |

|                         |   |      |      |              |       |       |      |       |
|-------------------------|---|------|------|--------------|-------|-------|------|-------|
| Hepatitis C Virus       | 5 | 700  | 0.67 | 0.31 to 1.42 | 0.286 | <0.01 | 79.9 |       |
| Hepatitis B Virus       | 5 | 2135 | 1.02 | 0.61 to 1.72 | 0.942 | 0.70  | 0.0  | 0.226 |
| Western Pacific         | 3 | 1793 | 0.80 | 0.55 to 1.17 | 0.244 | 0.16  | 0.0  |       |
| Europe                  | 1 | 323  | 1.24 | 0.77 to 1.97 | 0.378 | -     | -    |       |
| Americas                | 1 | 19   | 0.48 | 0.12 to 1.84 | 0.281 | -     | -    |       |
| Alcoholic Liver Disease | 2 | 344  | 0.92 | 0.69 to 1.23 | 0.571 | 0.43  | 0.00 |       |

---

**Curative therapy Only\***

---

**Overall survival**

|                   |   |      |      |              |              |      |      |  |
|-------------------|---|------|------|--------------|--------------|------|------|--|
| Hepatitis C Virus | 2 | 1243 | 1.22 | 1.01 to 1.48 | <b>0.041</b> | 0.97 | 0.00 |  |
| Hepatitis B Virus | 2 | 1715 | 1.01 | 0.61 to 1.67 | 0.955        | 0.78 | 0.00 |  |

---

Legend: \*defined as liver transplantation, liver resection and ablation;

\*\*subgroup difference refers to comparison of effect sizes between geographical regions for each etiology

Abbreviations: NAFLD, non-alcoholic fatty liver disease; hepatocellular carcinoma, HCC

**Supplementary Material 9:** Funnel plots for publication bias

Funnel plot of age between NAFLD and non-NAFLD-related HCC

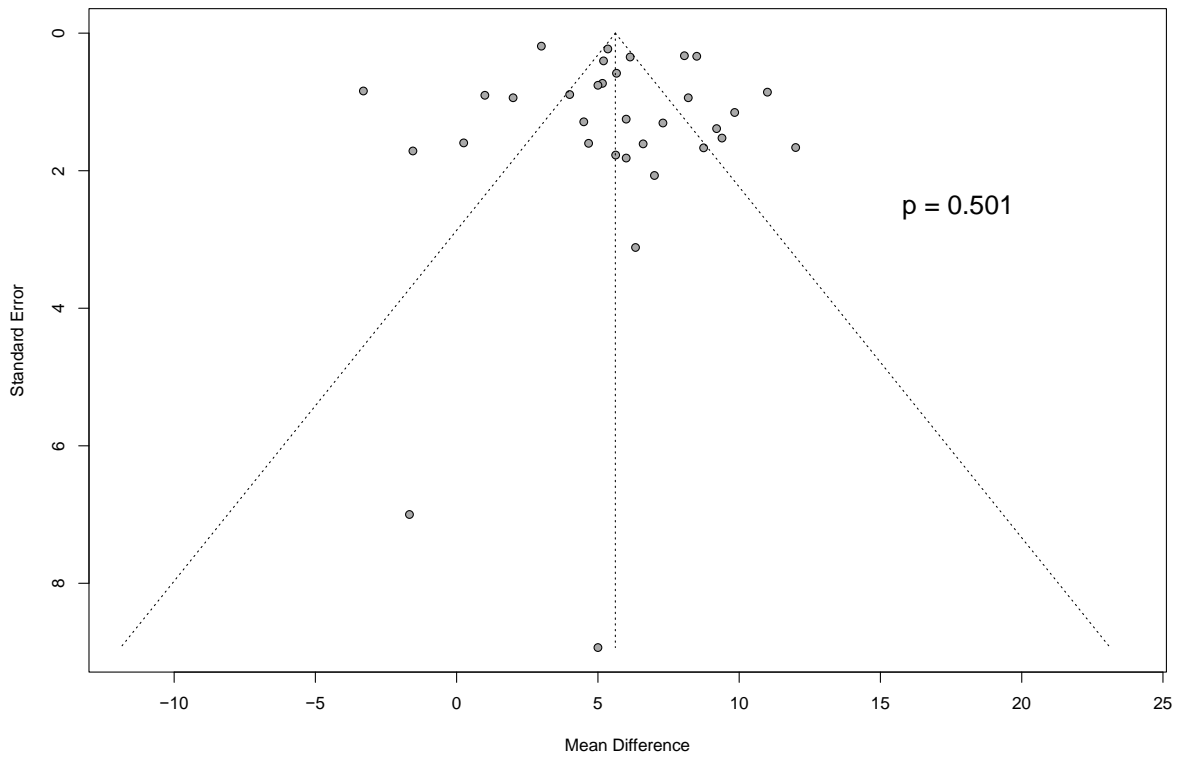

Funnel plot of body mass index (BMI) between NAFLD and non-NAFLD-related HCC

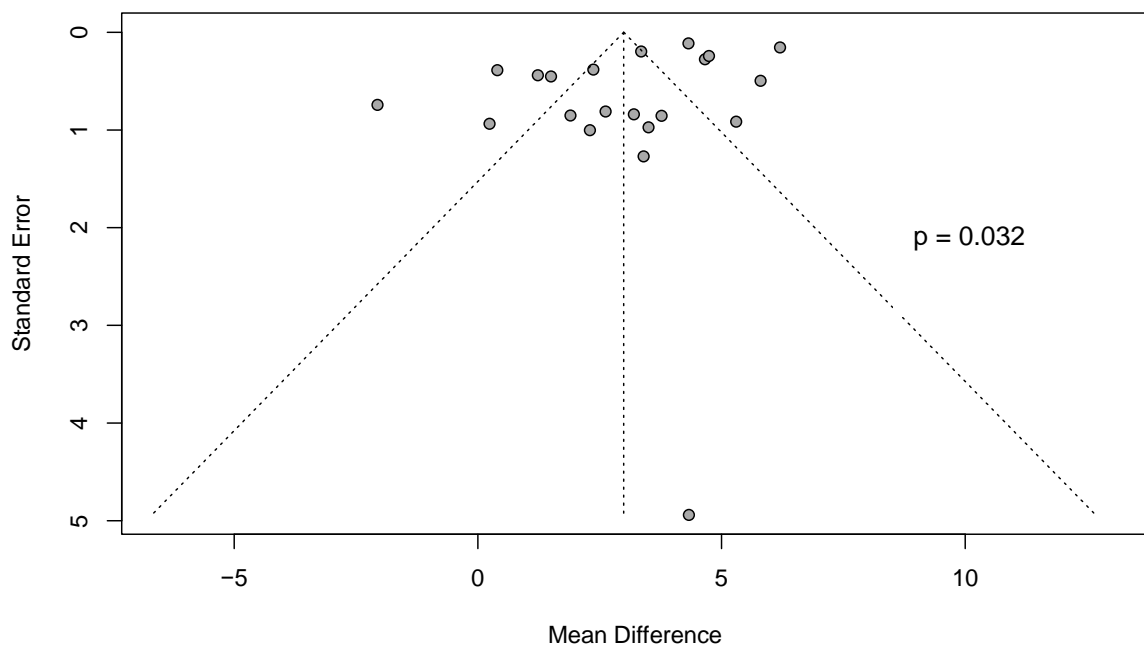

Funnel plot of diabetes between NAFLD and non-NAFLD-related HCC

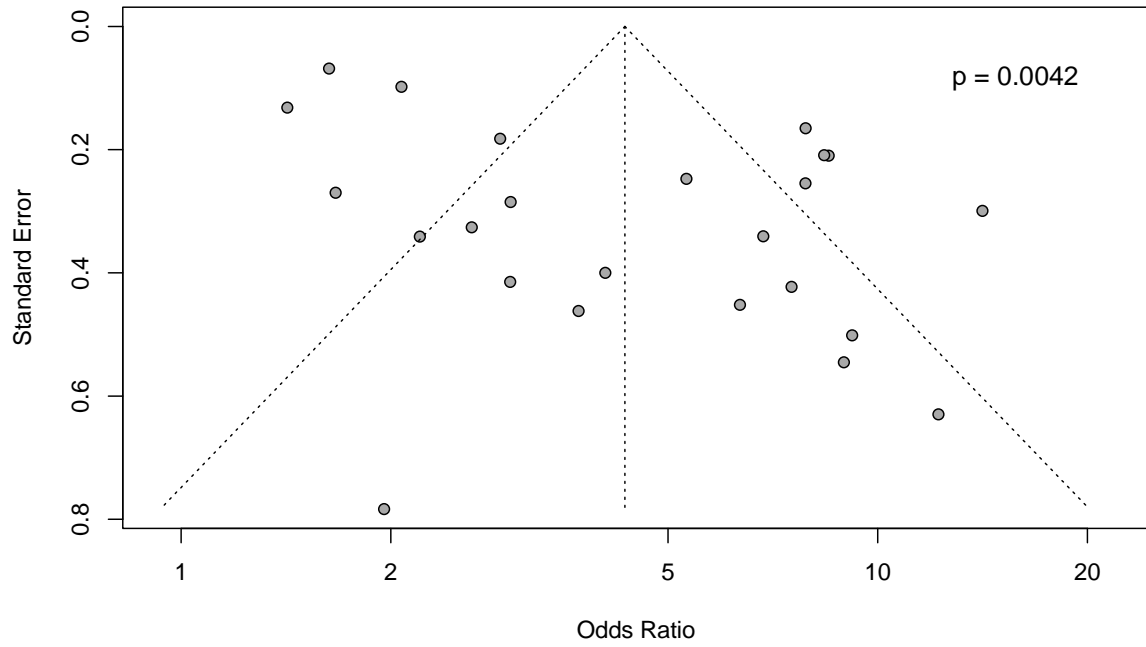

Funnel plot of hypertension between NAFLD and non-NAFLD-related HCC

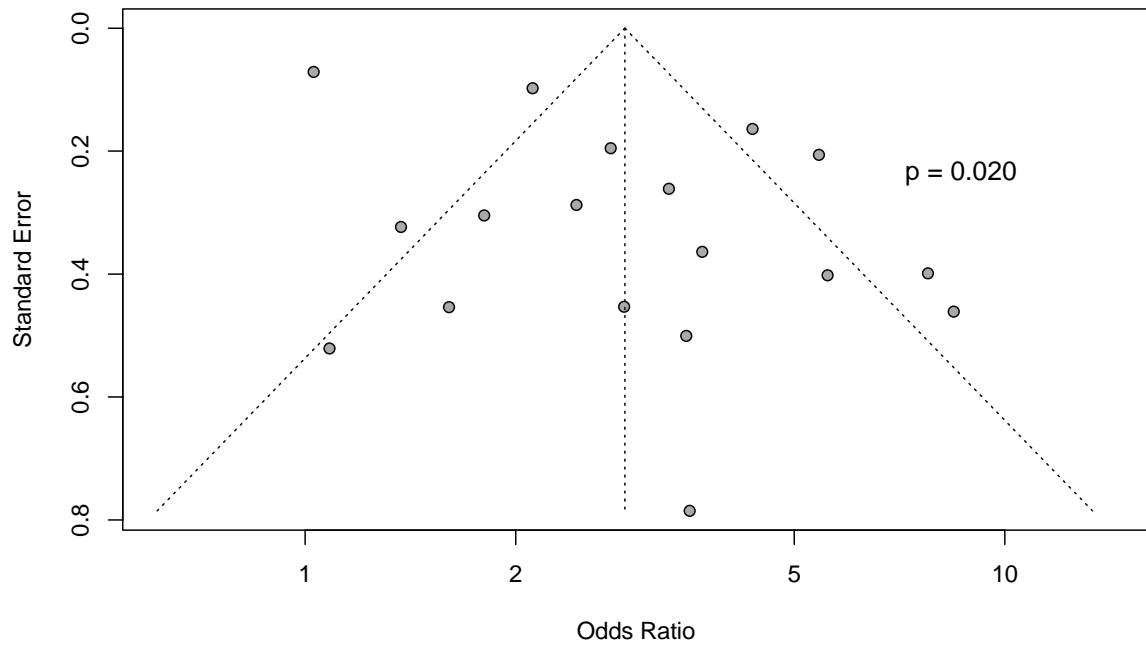

Funnel plot of male gender between NAFLD and non-NAFLD-related HCC

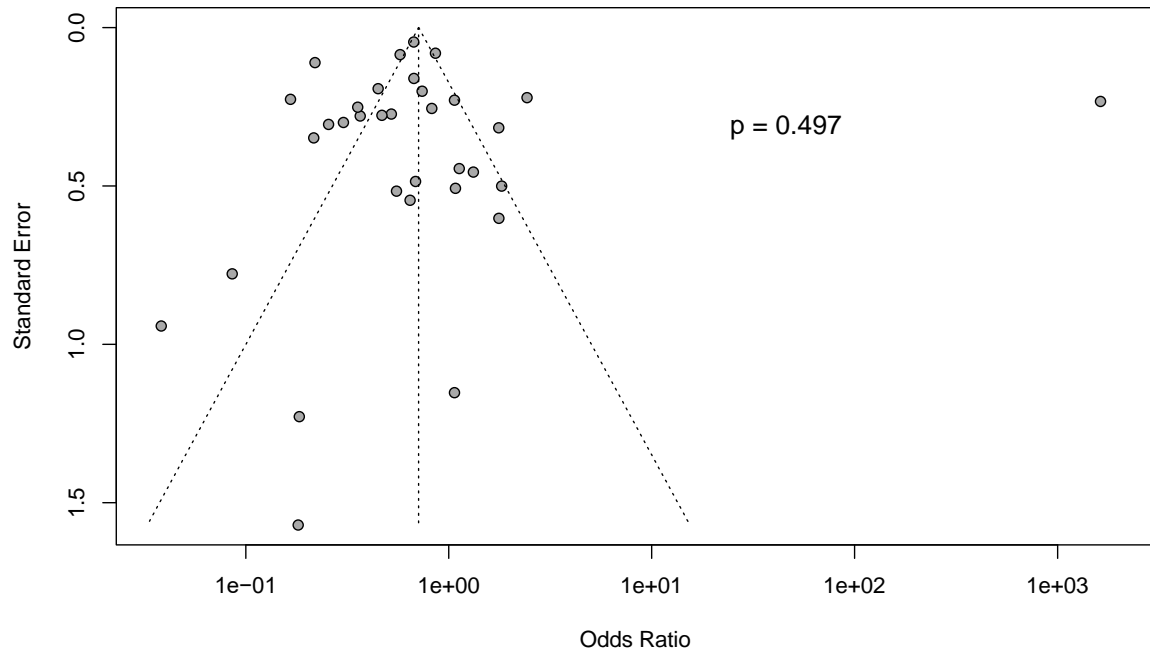



Funnel plot of non-cirrhosis between NAFLD and non-NAFLD-related HCC

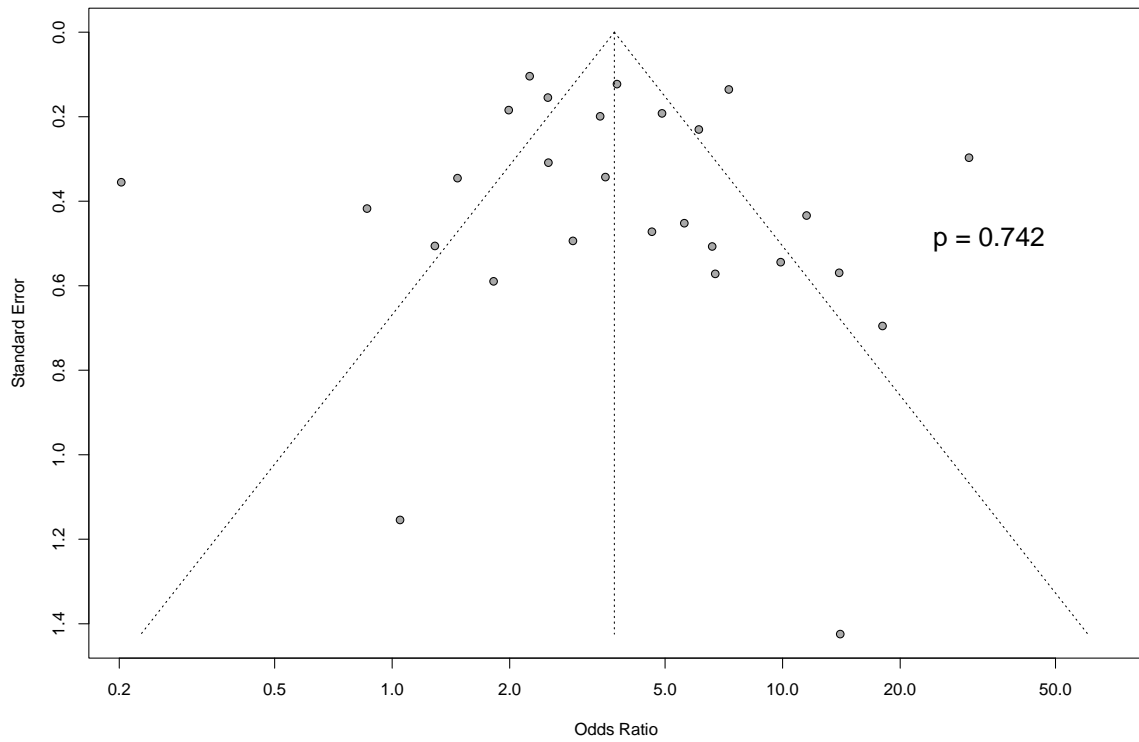

Funnel plot of mean tumor diameter between NAFLD and non-NAFLD-related HCC

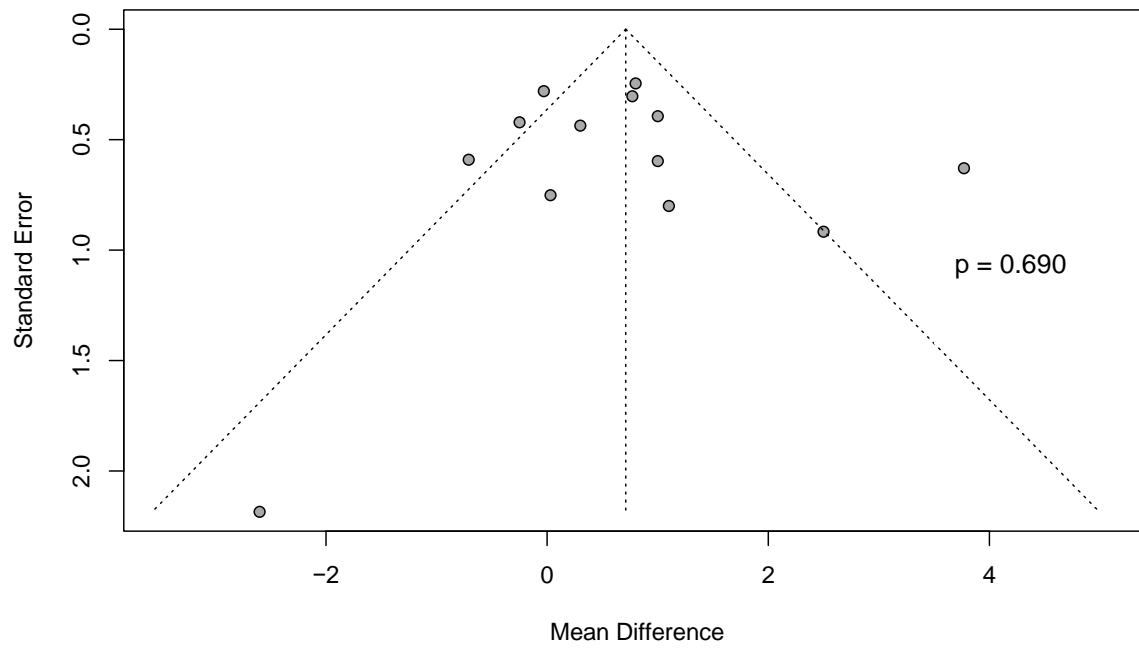

Funnel plot of unimodular tumor between NAFLD and non-NAFLD-related HCC

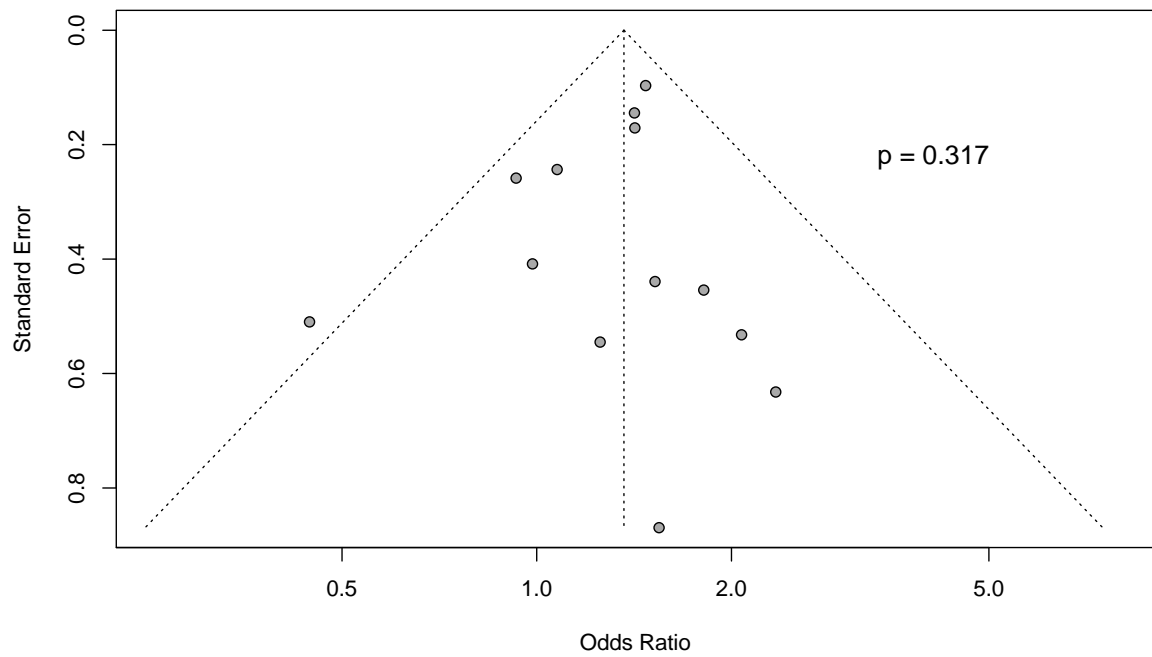

Funnel plot of BCLC B between NAFLD and non-NAFLD-related HCC

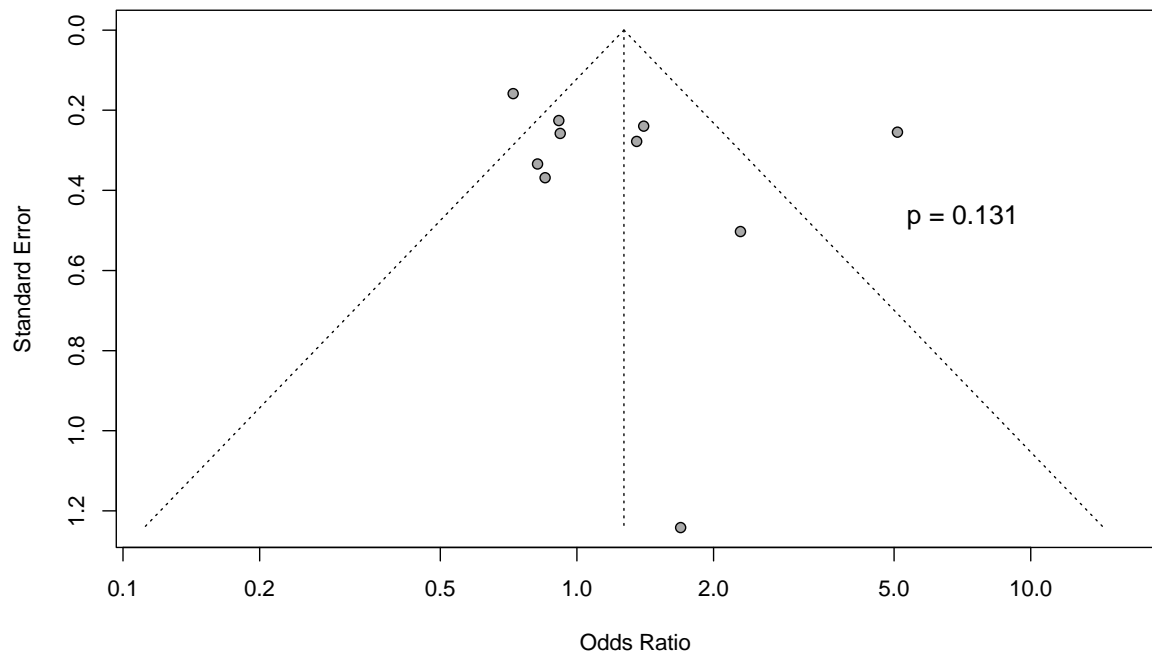

Funnel plot of BCLC C/D between NAFLD and non-NAFLD-related HCC

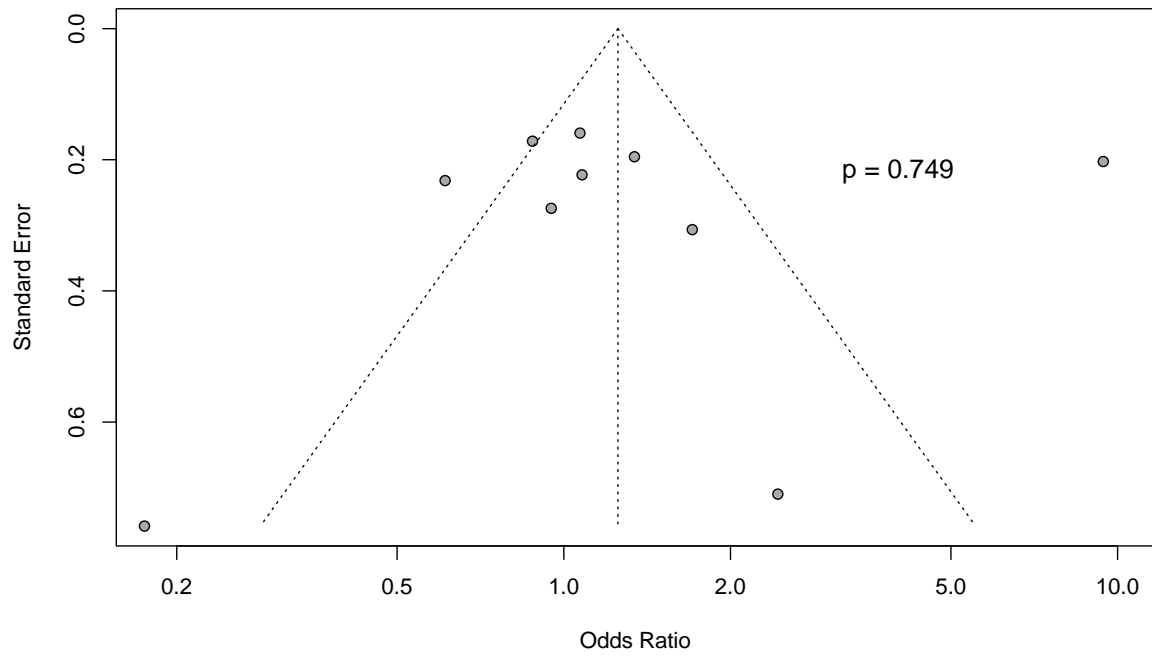

Funnel plot of allocation of curative treatment between NAFLD and non-NAFLD-related HCC

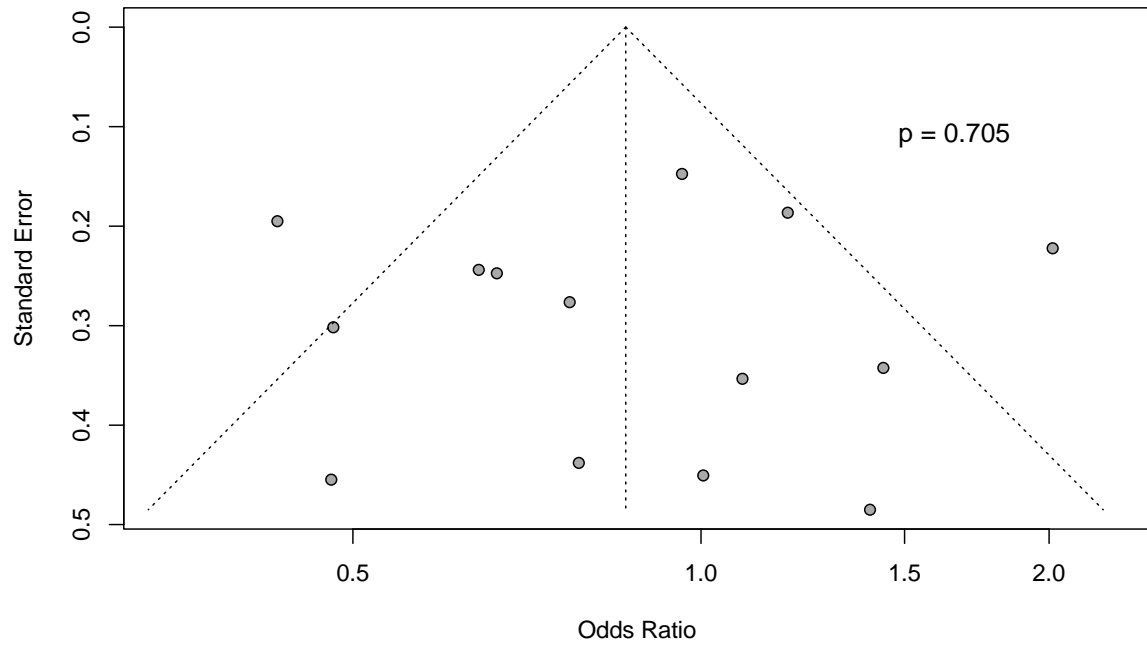

Funnel plot of allocation of palliative treatment between NAFLD and non-NAFLD-related HCC

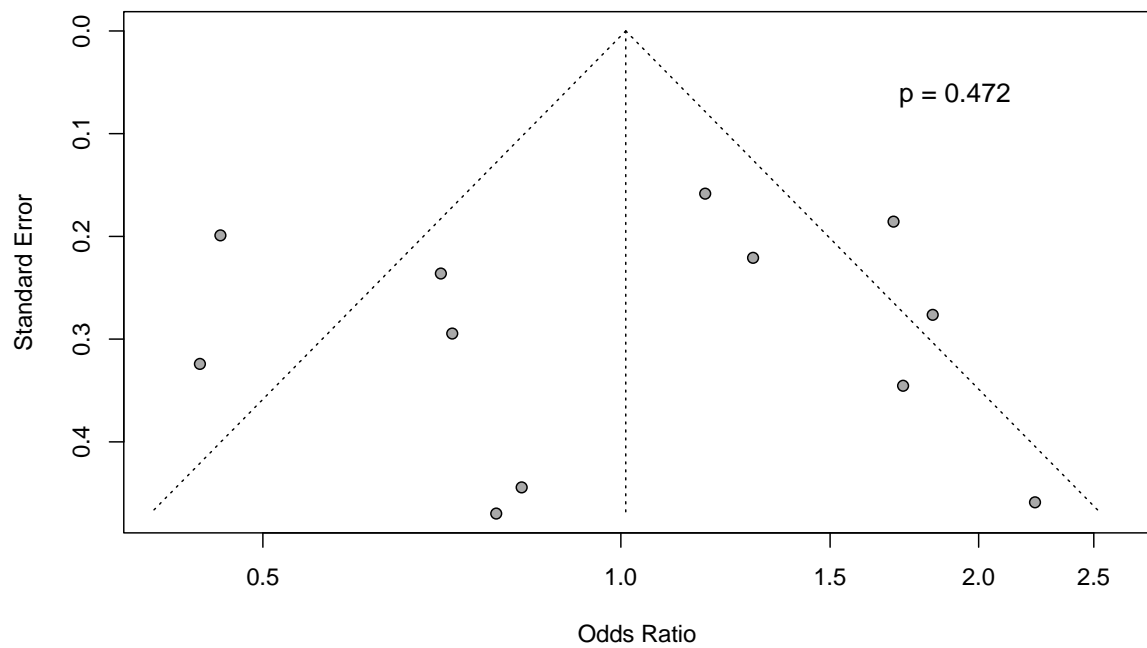

Funnel plot of overall survival (OS) between NAFLD and non-NAFLD-related HCC

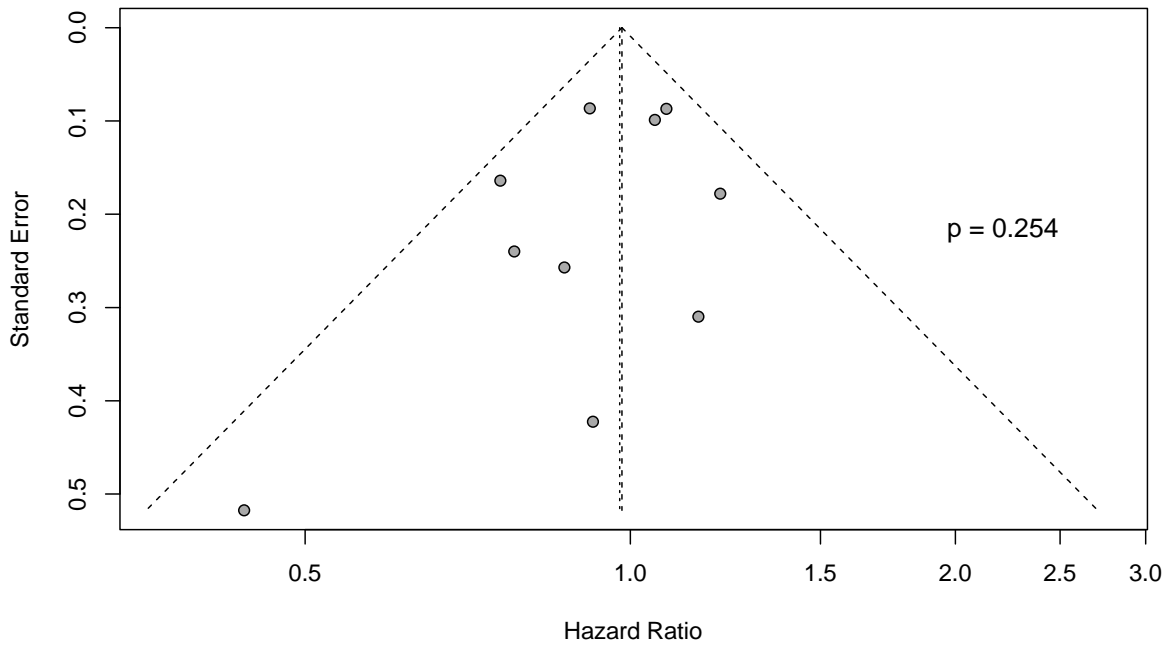

Funnel plot of disease-free survival (DFS) between NAFLD and non-NAFLD-related

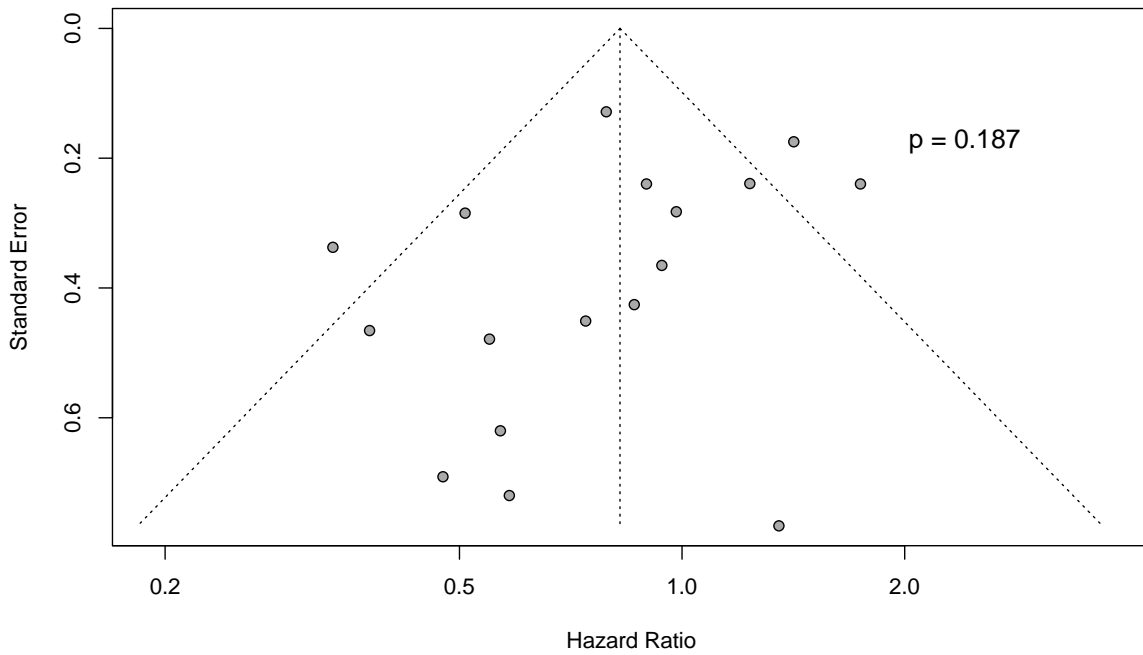

## **NAFLD HCC Meta-analysis Protocol**

### **Background:**

Non-alcoholic fatty liver disease (NAFLD) is the fastest rising cause of hepatocellular carcinoma (HCC) in the U.S. and parts of Europe, and is expected to rise exponentially in parallel with the global obesity epidemic.<sup>1-5</sup> However, the characteristics and outcomes of NAFLD HCC versus HCC from other etiologies, including hepatitis B (HBV), hepatitis C (HBV), and alcoholic liver disease (ALD), remain unclear. Existing studies have reported contrasting results, in part due to these studies being limited by geographical region or treatment.<sup>6-8</sup>

Therefore, we aim to conduct a systematic review and meta-analysis to compare the clinical features, prevalence, surveillance rates and outcomes of NAFLD-related HCC versus non-NAFLD HCC.

### **Aims:**

- (1) To determine the prevalence of HCC secondary to NAFLD, globally, by region, and over time
- (2) To evaluate the differences in patient characteristics (e.g. age, gender, presence of metabolic conditions including diabetes, hypertension, hyperlipidemia, presence of cirrhosis) and tumor characteristics (e.g. tumor number, tumor diameter, BCLC staging) and surveillance between NAFLD HCC and other etiologies, overall and by etiology
- (3) To determine differences in treatment allocation (curative treatment, palliative treatment, best supportive care) between NAFLD HCC and other etiologies, overall and by etiology
- (4) To determine differences in survival outcomes (overall survival, disease-free survival) between NAFLD HCC and other etiologies, overall and by etiology

### **Inclusion and exclusion criteria:**

Only studies written or translated to English language will be included, with no date filter. Prospective and retrospective cohort studies and randomized control trials will be considered for inclusion. Studies will be included if they (1) describe the prevalence of HCC secondary to NAFLD, the patient and tumor characteristic of NAFLD HCC, and the treatment allocation and survival outcomes of NAFLD HCC; and (2) compared these outcomes with HCC secondary to other etiologies (HBV, HCV, ALD). Studies that diagnosed NAFLD based on either (i) imaging, (ii) histology or (iii) ICD codes in the absence of

significant alcohol consumption and coexisting causes of chronic liver disease will be included for analysis.

Studies that were not published will be excluded. Editorials, case series/ report, review articles will also be excluded. Studies will be excluded if they included patients with HCC secondary to 'cryptogenic' causes.

**Analysis:**

A meta-analysis of proportions will be conducted using a generalized linear mixed model with Clopper-Pearson intervals to determine the prevalence of HCC secondary to NAFLD. Subgroup analysis will be conducted to determine the proportion of HCC secondary to NAFLD by geographical region according to the WHO regions, and by time period.

Comparative meta-analysis will be conducted in odds ratio and weighted mean difference to compare between patient characteristics, tumor characteristics, and treatment allocation between NAFLD HCC versus other etiologies. Subgroup analysis will be conducted for comparative outcomes stratified by individual etiology of HCC (i.e. HBV, HCV, ALD). Survival outcomes between NAFLD HCC and other etiologies will be performed via pooled analysis of hazard ratios. Subgroup analysis for survival outcomes will be stratified by presence of cirrhosis, and by type of treatment received. All comparative analysis will be conducted using the DerSimonian-Laird random effects model. All analysis will be conducted in R Studio using the 'meta' package. Quality assessment of included articles will done via the Joanna Briggs Institute (JBI) Critical Appraisal Tool

## REFERENCES

1. Younossi Z, Stepanova M, Ong JP, et al. Nonalcoholic Steatohepatitis Is the Fastest Growing Cause of Hepatocellular Carcinoma in Liver Transplant Candidates. *Clin Gastroenterol Hepatol*; **17**(4): 748-55.e3.
2. Dyson J, Jaques B, Chattopadhyay D, et al. Hepatocellular cancer: the impact of obesity, type 2 diabetes and a multidisciplinary team. *Journal of hepatology* 2014; **60**(1): 110-7.
3. Estes C, Chan HLY, Chien RN, et al. Modelling NAFLD disease burden in four Asian regions-2019-2030. *Aliment Pharmacol Ther*; **51**(8): 801-11.
4. Estes C, Razavi H, Loomba R, Younossi Z, Sanyal AJ. Modeling the epidemic of nonalcoholic fatty liver disease demonstrates an exponential increase in burden of disease. *Hepatology* 2018; **67**(1): 123-33.
5. Huang DQ, El-Serag HB, Loomba R. Global epidemiology of NAFLD-related HCC: trends, predictions, risk factors and prevention. *Nat Rev Gastroenterol Hepatol* 2021; **18**(4): 223-38.
6. Wong CR, Nguyen MH, Lim JK. Hepatocellular carcinoma in patients with non-alcoholic fatty liver disease. *World journal of gastroenterology* 2016; **22**(37): 8294.
7. Younossi ZM, Otgonsuren M, Henry L, et al. Association of nonalcoholic fatty liver disease (NAFLD) with hepatocellular carcinoma (HCC) in the United States from 2004 to 2009. *Hepatology* 2015; **62**(6): 1723-30.
8. Benhammou JN, Aby ES, Shirvanian G, Manansala K, Hussain SK, Tong MJ. Improved survival after treatments of patients with nonalcoholic fatty liver disease associated hepatocellular carcinoma. *Scientific reports* 2020; **10**(1): 1-9.
